# Supplementary material for: Theoretical study on homolytic B–B cleavages of diboron(4) compounds
Source: Royal Society of Chemistry journal article supplement (doi:10.1039/c7ra09006d), 2017-01-01
Supplement: c7ra09006d1.pdf [file c7ra09006d1.pdf]

## Supporting Information

### Theoretical study on homolytic B-B cleavages of diboron(4) compounds

Jiaoyang Wang, Wenrui Zheng,\* Yuanyuan Zheng

College of Chemistry and Chemical Engineering, Shanghai University of Engineering Science, Shanghai 201620, China

Table S1 The 34 B-B BDEs calculated by using 28 kinds of DFT methods (kJ/mol)

| Entry | Molecules | M06-HF | M05-2X | WB97  | MN12-SX | BMK   | SOGGA11-X | WB97XD | M06-2X | M06   | KMLYP |
|-------|-----------|--------|--------|-------|---------|-------|-----------|--------|--------|-------|-------|
| 1     |           | 429.0  | 447.2  | 444.1 | 423.5   | 425.6 | 434.8     | 423.1  | 414.6  | 425.3 | 445.1 |
| 2     |           | 409.9  | 425.0  | 423.2 | 402.6   | 404.1 | 413.1     | 403.8  | 396.2  | 404.4 | 422.7 |
| 3     |           | 402.9  | 416.7  | 415.4 | 391.7   | 396.5 | 406.6     | 398.2  | 388.7  | 393.7 | 413.5 |
| 4     |           | 388.3  | 399.8  | 399.0 | 378.3   | 379.2 | 387.7     | 382.6  | 374.7  | 381.1 | 396.1 |
| 5     |           | 390.1  | 401.8  | 400.9 | 377.9   | 382.1 | 391.5     | 386.9  | 377.4  | 380.5 | 397.9 |
| 6     |           | 404.2  | 413.2  | 411.6 | 388.0   | 393.9 | 402.1     | 399.3  | 390.4  | 390.7 | 408.5 |
| 7     |           | 408.3  | 435.3  | 437.0 | 400.9   | 410.2 | 423.9     | 415.0  | 400.5  | 409.8 | 427.2 |
| 8     |           | 402.6  | 425.1  | 426.6 | 393.9   | 401.8 | 413.8     | 406.9  | 393.5  | 401.3 | 418.5 |
| 9     |           | 400.3  | 418.0  | 418.8 | 389.7   | 395.5 | 405.6     | 400.6  | 389.7  | 395.3 | 411.5 |
| 10    |           | 397.4  | 415.7  | 417.0 | 386.9   | 394.6 | 405.2     | 399.8  | 387.2  | 392.4 | 410.8 |
| 11    |           | 396.8  | 410.8  | 410.9 | 383.9   | 390.7 | 400.2     | 396.0  | 385.1  | 387.8 | 406.2 |
| 12    |           | 423.1  | 457.0  | 451.0 | 429.5   | 432.9 | 445.4     | 428.5  | 414.8  | 427.2 | 450.1 |
| 13    |           | 424.9  | 430.5  | 430.1 | 410.5   | 416.6 | 423.6     | 411.2  | 407.2  | 414.6 | 433.0 |
| 14    |           | 420.3  | 420.9  | 419.2 | 396.0   | 409.2 | 408.9     | 401.7  | 400.4  | 403.3 | 422.2 |
| 15    |           | 418.5  | 420.9  | 419.8 | 395.7   | 407.3 | 409.9     | 404.3  | 399.9  | 402.0 | 421.2 |
| 16    |           | 413.6  | 417.9  | 416.8 | 392.1   | 403.0 | 406.9     | 402.3  | 396.5  | 397.2 | 416.8 |
| 17    |           | 416.7  | 420.4  | 419.0 | 395.0   | 404.6 | 409.2     | 404.4  | 398.4  | 400.5 | 418.8 |
| 18    |           | 410.2  | 416.9  | 415.5 | 391.5   | 399.3 | 405.7     | 402.1  | 394.6  | 395.7 | 413.9 |
| 19    |           | 415.2  | 438.0  | 437.6 | 408.8   | 414.7 | 426.4     | 415.9  | 404.2  | 414.4 | 432.6 |
| 20    |           | 402.8  | 426.3  | 426.4 | 397.8   | 403.2 | 415.7     | 406.2  | 392.5  | 402.3 | 420.5 |

\* Corresponding author. Tel.: +86 21 67791216; fax: +86 21 67791220.  
E-mail address: wrzheng@sues.edu.cn (W.R. Zheng).

|    |                                                                                     |       |       |       |       |       |       |       |       |       |       |
|----|-------------------------------------------------------------------------------------|-------|-------|-------|-------|-------|-------|-------|-------|-------|-------|
| 21 | 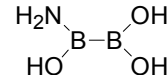   | 414.0 | 435.6 | 434.2 | 409.9 | 413.2 | 424.0 | 412.9 | 402.6 | 413.1 | 432.0 |
| 22 |    | 403.1 | 428.6 | 429.1 | 397.9 | 404.3 | 417.3 | 407.2 | 394.7 | 404.9 | 421.6 |
| 23 |    | 431.0 | 458.5 | 455.8 | 428.9 | 433.8 | 446.9 | 433.7 | 419.6 | 431.0 | 451.4 |
| 24 |    | 431.2 | 462.0 | 457.4 | 433.5 | 438.0 | 450.5 | 435.3 | 421.4 | 433.8 | 455.1 |
| 25 |    | 419.1 | 446.5 | 446.3 | 414.6 | 421.8 | 434.9 | 423.8 | 409.7 | 420.4 | 439.1 |
| 26 |    | 436.6 | 455.0 | 455.3 | 429.8 | 436.6 | 444.5 | 433.7 | 425.4 | 434.5 | 453.0 |
| 27 |    | 428.2 | 440.5 | 441.0 | 419.6 | 424.3 | 431.0 | 419.1 | 414.4 | 423.3 | 440.4 |
| 28 |    | 421.5 | 444.5 | 445.5 | 414.6 | 422.7 | 433.2 | 423.8 | 412.2 | 421.6 | 439.4 |
| 29 |  | 398.3 | 412.6 | 410.4 | 390.6 | 393.3 | 403.6 | 393.1 | 383.2 | 388.9 | 409.8 |
| 30 |  | 401.1 | 413.5 | 411.9 | 389.4 | 394.0 | 403.6 | 396.8 | 387.1 | 390.5 | 410.0 |
| 31 |  | 413.2 | 437.6 | 434.1 | 412.6 | 416.4 | 428.2 | 414.1 | 401.4 | 411.0 | 433.1 |
| 32 |  | 416.8 | 424.0 | 422.5 | 401.9 | 407.4 | 414.7 | 406.3 | 401.4 | 406.5 | 423.5 |
| 33 |  | 412.7 | 421.8 | 420.1 | 397.6 | 403.6 | 411.3 | 405.8 | 399.0 | 401.7 | 419.2 |
| 34 |  | 422.5 | 429.4 | 428.4 | 408.2 | 414.3 | 421.3 | 410.9 | 406.4 | 412.3 | 430.6 |

| Entry | Molecules                                                                           | MN12-L | M11   | N12-SX | MPW1B95 | BP86-D3 | MPW1P86 | N12   | B3P86 | B3LYP-D3 | M05   |
|-------|-------------------------------------------------------------------------------------|--------|-------|--------|---------|---------|---------|-------|-------|----------|-------|
| 1     | 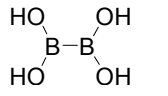 | 414.3  | 417.3 | 427.3  | 420.7   | 409.7   | 411.8   | 410.0 | 411.2 | 413.6    | 428.7 |
| 2     |  | 395.1  | 397.3 | 406.5  | 400.0   | 391.1   | 391.2   | 390.4 | 390.6 | 393.0    | 406.9 |
| 3     |  | 382.7  | 388.9 | 399.7  | 391.4   | 384.3   | 383.7   | 384.8 | 383.5 | 386.3    | 400.4 |
| 4     |  | 372.4  | 373.3 | 381.7  | 375.0   | 370.4   | 367.0   | 366.7 | 366.5 | 370.1    | 382.0 |
| 5     |  | 370.7  | 374.9 | 386.0  | 377.4   | 373.7   | 370.2   | 372.8 | 370.2 | 373.5    | 386.3 |
| 6     |  | 381.1  | 386.9 | 397.0  | 388.1   | 385.8   | 380.7   | 384.4 | 380.6 | 385.1    | 395.9 |
| 7     |  | 390.9  | 400.5 | 414.5  | 407.4   | 398.8   | 397.1   | 398.8 | 395.7 | 400.7    | 417.3 |
| 8     |  | 384.5  | 393.1 | 405.6  | 398.5   | 390.8   | 388.6   | 390.3 | 387.4 | 392.3    | 407.1 |
| 9     |  | 382.6  | 388.9 | 398.4  | 391.2   | 385.6   | 381.6   | 383.7 | 380.3 | 386.2    | 398.8 |
| 10    |  | 377.2  | 385.7 | 398.1  | 390.6   | 383.5   | 381.4   | 383.2 | 380.6 | 384.5    | 398.4 |
| 11    |  | 375.2  | 383.0 | 394.1  | 385.6   | 380.4   | 377.4   | 380.0 | 376.9 | 381.0    | 393.9 |

|    |  |       |       |       |       |       |       |       |       |       |       |
|----|--|-------|-------|-------|-------|-------|-------|-------|-------|-------|-------|
| 12 |  | 421.2 | 424.7 | 436.0 | 425.7 | 408.8 | 417.9 | 422.8 | 417.4 | 414.9 | 442.3 |
| 13 |  | 409.5 | 404.0 | 416.0 | 408.8 | 402.6 | 402.5 | 407.1 | 401.8 | 402.7 | 416.4 |
| 14 |  | 392.3 | 394.0 | 403.9 | 399.4 | 399.3 | 391.5 | 396.7 | 389.8 | 397.3 | 397.9 |
| 15 |  | 390.2 | 393.9 | 404.6 | 398.6 | 397.5 | 390.9 | 396.6 | 389.5 | 396.2 | 401.4 |
| 16 |  | 386.4 | 391.7 | 401.9 | 394.4 | 393.0 | 387.1 | 391.3 | 386.2 | 392.3 | 399.8 |
| 17 |  | 388.8 | 393.3 | 403.9 | 396.9 | 394.8 | 389.2 | 394.9 | 388.1 | 393.9 | 402.4 |
| 18 |  | 384.9 | 390.5 | 400.6 | 392.4 | 390.1 | 385.0 | 389.6 | 384.3 | 389.6 | 399.7 |
| 19 |  | 399.3 | 405.8 | 418.1 | 411.3 | 402.0 | 401.6 | 402.1 | 400.7 | 404.5 | 420.0 |
| 20 |  | 388.2 | 393.9 | 407.4 | 400.6 | 392.9 | 391.6 | 392.7 | 391.0 | 394.1 | 409.8 |
| 21 |  | 401.5 | 405.3 | 416.3 | 409.8 | 399.7 | 400.4 | 400.2 | 399.6 | 402.5 | 417.7 |
| 22 |  | 388.6 | 395.5 | 408.1 | 401.6 | 392.8 | 391.5 | 392.5 | 390.3 | 395.1 | 411.4 |
| 23 |  | 420.0 | 426.5 | 439.1 | 429.8 | 416.7 | 420.5 | 425.1 | 419.9 | 421.4 | 442.3 |
| 24 |  | 425.1 | 429.6 | 442.2 | 432.3 | 417.3 | 423.6 | 428.9 | 423.1 | 422.6 | 446.7 |
| 25 |  | 405.6 | 413.7 | 426.9 | 418.4 | 407.3 | 408.4 | 412.0 | 407.3 | 410.8 | 429.7 |
| 26 |  | 427.3 | 426.7 | 436.6 | 430.7 | 423.3 | 421.4 | 424.3 | 420.0 | 424.9 | 436.2 |
| 27 |  | 419.6 | 414.0 | 423.2 | 417.3 | 409.9 | 409.0 | 412.3 | 407.6 | 410.5 | 422.0 |
| 28 |  | 408.4 | 413.1 | 424.9 | 418.1 | 410.0 | 408.4 | 410.8 | 406.9 | 411.9 | 426.1 |
| 29 |  | 385.3 | 387.6 | 397.7 | 387.2 | 377.2 | 380.5 | 384.0 | 380.9 | 380.2 | 399.6 |
| 30 |  | 383.2 | 388.0 | 398.4 | 388.3 | 381.5 | 381.2 | 385.2 | 381.5 | 383.1 | 399.0 |
| 31 |  | 405.7 | 409.2 | 420.6 | 409.6 | 396.3 | 402.5 | 407.4 | 402.7 | 400.8 | 424.5 |
| 32 |  | 398.9 | 398.8 | 408.7 | 400.2 | 395.6 | 393.8 | 397.4 | 393.3 | 396.2 | 410.7 |
| 33 |  | 392.9 | 396.0 | 406.0 | 397.0 | 393.5 | 390.2 | 393.7 | 389.9 | 393.6 | 406.6 |
| 34 |  | 406.5 | 403.3 | 414.6 | 406.6 | 401.2 | 400.3 | 404.3 | 399.7 | 401.6 | 415.7 |

| Entry | Molucules | M06-L | CAM-B3LYP | PBE1PBE | SOGGA11 | MPW1K | B3LYP | M11-L | B97D  |
|-------|-----------|-------|-----------|---------|---------|-------|-------|-------|-------|
| 1     |           | 412.1 | 414.7     | 407.9   | 400.9   | 407.8 | 402.4 | 384.1 | 406.0 |

|    |                                                                                     |       |       |       |       |       |       |       |       |
|----|-------------------------------------------------------------------------------------|-------|-------|-------|-------|-------|-------|-------|-------|
| 2  | 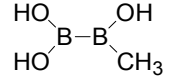   | 391.2 | 393.2 | 387.7 | 384.3 | 386.4 | 381.1 | 366.4 | 388.2 |
| 3  |    | 380.0 | 385.2 | 380.5 | 377.7 | 379.4 | 374.6 | 358.0 | 383.8 |
| 4  |    | 367.5 | 367.8 | 364.0 | 366.4 | 361.6 | 356.5 | 345.2 | 370.2 |
| 5  |    | 367.6 | 370.4 | 367.5 | 371.6 | 365.1 | 360.6 | 346.9 | 374.8 |
| 6  |    | 376.5 | 381.0 | 378.3 | 386.6 | 375.4 | 371.0 | 357.4 | 388.3 |
| 7  |    | 394.6 | 400.2 | 393.5 | 397.1 | 390.8 | 387.9 | 365.3 | 403.9 |
| 8  |    | 385.9 | 391.1 | 385.2 | 390.1 | 382.6 | 379.0 | 359.5 | 395.2 |
| 9  |    | 379.5 | 383.6 | 378.3 | 384.6 | 375.1 | 371.7 | 357.2 | 390.4 |
| 10 |    | 377.1 | 383.2 | 378.3 | 383.4 | 376.0 | 371.7 | 353.9 | 386.7 |
| 11 |   | 372.8 | 378.5 | 374.6 | 381.3 | 372.4 | 367.7 | 352.3 | 383.5 |
| 12 |  | 416.9 | 421.4 | 413.4 | 413.2 | 413.3 | 410.8 | 388.2 | 413.4 |
| 13 |  | 400.9 | 402.3 | 399.6 | 396.6 | 398.2 | 391.2 | 376.0 | 389.2 |
| 14 |  | 382.0 | 390.0 | 389.2 | 399.0 | 386.0 | 378.0 | 368.7 | 381.1 |
| 15 |  | 381.7 | 390.2 | 388.7 | 398.9 | 386.0 | 378.7 | 368.0 | 384.2 |
| 16 |  | 379.4 | 386.9 | 384.9 | 395.7 | 382.5 | 375.8 | 363.6 | 385.3 |
| 17 |  | 381.0 | 388.8 | 386.8 | 397.0 | 384.1 | 377.8 | 366.1 | 386.5 |
| 18 |  | 378.7 | 385.0 | 382.6 | 392.6 | 379.9 | 374.5 | 362.2 | 387.3 |
| 19 |  | 400.8 | 404.5 | 397.9 | 395.4 | 396.2 | 392.5 | 371.8 | 402.4 |
| 20 |  | 389.5 | 393.5 | 388.1 | 387.5 | 385.9 | 382.4 | 362.9 | 393.0 |
| 21 |  | 400.5 | 402.9 | 396.6 | 392.5 | 395.3 | 390.9 | 372.9 | 397.7 |
| 22 |  | 391.0 | 394.3 | 387.7 | 389.1 | 385.3 | 382.6 | 361.0 | 396.0 |
| 23 |  | 419.2 | 424.2 | 416.5 | 417.2 | 415.0 | 413.3 | 388.7 | 420.3 |
| 24 |  | 422.8 | 427.1 | 419.4 | 419.0 | 418.5 | 416.5 | 393.2 | 421.3 |
| 25 |  | 407.2 | 412.0 | 404.5 | 406.4 | 402.5 | 400.3 | 376.4 | 411.8 |
| 26 |  | 420.1 | 423.1 | 417.8 | 418.7 | 415.5 | 410.7 | 395.1 | 417.0 |
| 27 |  | 409.0 | 409.5 | 405.6 | 403.2 | 403.4 | 396.9 | 384.0 | 400.0 |

|    |                                                                                                                                                 |       |       |       |       |       |       |       |       |
|----|-------------------------------------------------------------------------------------------------------------------------------------------------|-------|-------|-------|-------|-------|-------|-------|-------|
| 28 | $\begin{array}{c} \text{H}_2\text{N} \\ \text{H}_2\text{N} \end{array} \text{B}-\text{B} \begin{array}{c} \text{NH}_2 \\ \text{Cl} \end{array}$ | 406.7 | 410.9 | 404.7 | 407.7 | 402.4 | 398.4 | 379.3 | 409.7 |
| 29 | $\begin{array}{c} \text{H}_3\text{C} \\ \text{F} \end{array} \text{B}-\text{B} \begin{array}{c} \text{F} \\ \text{CH}_3 \end{array}$            | 377.9 | 382.2 | 377.1 | 375.4 | 376.2 | 372.7 | 351.3 | 378.9 |
| 30 | $\begin{array}{c} \text{H}_3\text{C} \\ \text{H}_3\text{C} \end{array} \text{B}-\text{B} \begin{array}{c} \text{CH}_3 \\ \text{F} \end{array}$  | 377.9 | 382.4 | 378.3 | 379.6 | 376.6 | 372.7 | 354.9 | 383.8 |
| 31 | $\begin{array}{c} \text{H}_3\text{C} \\ \text{F} \end{array} \text{B}-\text{B} \begin{array}{c} \text{F} \\ \text{F} \end{array}$               | 400.2 | 405.0 | 398.5 | 395.9 | 398.1 | 395.2 | 371.9 | 399.3 |
| 32 | $\begin{array}{c} \text{H}_3\text{C} \\ \text{Cl} \end{array} \text{B}-\text{B} \begin{array}{c} \text{Cl} \\ \text{CH}_3 \end{array}$          | 391.5 | 393.9 | 390.9 | 392.5 | 389.2 | 383.5 | 369.4 | 389.2 |
| 33 | $\begin{array}{c} \text{H}_3\text{C} \\ \text{H}_3\text{C} \end{array} \text{B}-\text{B} \begin{array}{c} \text{CH}_3 \\ \text{Cl} \end{array}$ | 387.0 | 390.5 | 387.5 | 392.3 | 385.4 | 380.3 | 366.2 | 391.4 |
| 34 | $\begin{array}{c} \text{H}_3\text{C} \\ \text{Cl} \end{array} \text{B}-\text{B} \begin{array}{c} \text{Cl} \\ \text{Cl} \end{array}$            | 398.1 | 400.2 | 397.4 | 397.0 | 395.9 | 389.4 | 374.4 | 391.3 |

Table S2 The B-B BDE predictions of several diboron(4) compounds by using SOGGA11-X method

| Entry | Compounds                                                                           | B-B BDEs | Entry | Compounds                                                                             | B-B BDEs |
|-------|-------------------------------------------------------------------------------------|----------|-------|---------------------------------------------------------------------------------------|----------|
| 1     | 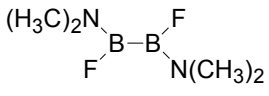   | 437.9    | 10    |    | 487.7    |
| 2     |    | 426.5    | 11    |    | 373.6    |
| 3     |    | 452.6    | 12    |    | 488.0    |
| 4     |  | 442.9    | 13    |   | 486.1    |
| 5     |  | 435.7    | 14    |  | 465.2    |
| 6     |  | 446.9    | 15    |  | 464.0    |
| 7     |  | 469.0    | 16    |  | 455.6    |
| 8     |  | 468.4    | 17    |  | 520.9    |
| 9     |  | 469.6    | 18    |  | 411.1    |

Table S3 The Cartesian coordinates and absolute energy values (hartrees) of selected molecules and radicals

| Molecules:                                                                                                      |             |             |             |                                                                                                                   |             |             |             |
|-----------------------------------------------------------------------------------------------------------------|-------------|-------------|-------------|-------------------------------------------------------------------------------------------------------------------|-------------|-------------|-------------|
| 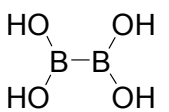<br>SCF energy=-353.2265494    |             |             |             | <br>SCF energy=-317.2640759    |             |             |             |
| B                                                                                                               | 0.21608500  | -0.80020300 | -0.22538200 | B                                                                                                                 | -0.86790400 | 0.12276500  | 0.00000900  |
| B                                                                                                               | -0.21608500 | 0.80020300  | 0.22538200  | B                                                                                                                 | 0.84572800  | -0.13045000 | -0.00002600 |
| O                                                                                                               | 1.52957800  | -1.05408800 | -0.53456200 | O                                                                                                                 | -1.63719400 | -1.01813800 | 0.00007700  |
| H                                                                                                               | 1.68896400  | -1.98179000 | -0.77839800 | H                                                                                                                 | -2.59327100 | -0.84062800 | 0.00040100  |
| O                                                                                                               | 0.67522100  | 1.84189000  | 0.29512900  | O                                                                                                                 | 1.27000200  | -1.43083200 | -0.00007300 |
| H                                                                                                               | 1.57619400  | 1.57261600  | 0.06064900  | H                                                                                                                 | 0.52457000  | -2.05481700 | -0.00026900 |
| O                                                                                                               | -1.52957800 | 1.05408800  | 0.53456200  | O                                                                                                                 | -1.54256600 | 1.32285000  | -0.00010800 |
| H                                                                                                               | -1.68896400 | 1.98179000  | 0.77839800  | H                                                                                                                 | -0.96099000 | 2.09576200  | -0.00007900 |
| O                                                                                                               | -0.67522100 | -1.84189000 | -0.29512900 | C                                                                                                                 | 1.95553000  | 0.99321100  | 0.00007900  |
| H                                                                                                               | -1.57619400 | -1.57261600 | -0.06064900 | H                                                                                                                 | 1.85589100  | 1.65149900  | -0.87733200 |
|                                                                                                                 |             |             |             | H                                                                                                                 | 1.85603900  | 1.65111100  | 0.87780400  |
|                                                                                                                 |             |             |             | H                                                                                                                 | 2.97352600  | 0.58518300  | -0.00008600 |
| <br>SCF energy =-281.3000649 |             |             |             | <br>SCF energy =-281.300114  |             |             |             |
| B                                                                                                               | 0.89790100  | 0.00150000  | -0.00403300 | B                                                                                                                 | -0.84269300 | -0.22431000 | -0.00000300 |
| B                                                                                                               | -0.81633700 | -0.00093800 | 0.00289400  | B                                                                                                                 | 0.84269300  | 0.22431000  | 0.00000200  |
| O                                                                                                               | 1.54986800  | 0.06945800  | -1.21058800 | O                                                                                                                 | 1.20459300  | 1.54842700  | -0.00001400 |
| H                                                                                                               | 2.51720900  | 0.05609500  | -1.10469500 | H                                                                                                                 | 0.44710100  | 2.15373000  | 0.00011000  |
| O                                                                                                               | 1.71650700  | -0.06187900 | 1.11282900  | O                                                                                                                 | -1.20459300 | -1.54842700 | 0.00001400  |
| H                                                                                                               | 1.25211800  | -0.12115500 | 1.95835300  | H                                                                                                                 | -0.44710100 | -2.15373000 | -0.00011100 |
| C                                                                                                               | -1.61723900 | 1.36057900  | 0.04065900  | C                                                                                                                 | -2.03877900 | 0.81336700  | -0.00001900 |
| H                                                                                                               | -1.66850300 | 1.66470700  | 1.10315700  | H                                                                                                                 | -1.99454300 | 1.47635000  | 0.87870900  |
| H                                                                                                               | -1.12696100 | 2.19340600  | -0.47902200 | H                                                                                                                 | -1.99402100 | 1.47720600  | -0.87806400 |
| H                                                                                                               | -2.65725400 | 1.28321700  | -0.30430900 | H                                                                                                                 | -3.02212800 | 0.32757300  | -0.00052300 |
| C                                                                                                               | -1.61605200 | -1.36175500 | -0.04338200 | C                                                                                                                 | 2.03877900  | -0.81336700 | 0.00002000  |
| H                                                                                                               | -1.68252600 | -1.61725500 | -1.11768900 | H                                                                                                                 | 1.99402200  | -1.47720300 | 0.87806700  |
| H                                                                                                               | -1.12215400 | -2.22024000 | 0.42935700  | H                                                                                                                 | 1.99454200  | -1.47635300 | -0.87870600 |
| H                                                                                                               | -2.65100300 | -1.29516900 | 0.31895000  | H                                                                                                                 | 3.02212800  | -0.32757300 | 0.00052000  |
| <br>SCF energy =-245.3402161 |             |             |             | <br>SCF energy =-209.3832803 |             |             |             |
| B                                                                                                               | 0.82233200  | -0.00399700 | -0.00217500 | B                                                                                                                 | 0.84098400  | -0.00006500 | -0.00000300 |
| B                                                                                                               | -0.88177900 | 0.04628500  | 0.09579200  | B                                                                                                                 | -0.84098200 | -0.00007300 | 0.00001500  |
| O                                                                                                               | -1.56135100 | 0.51368500  | 1.20382900  | C                                                                                                                 | -1.66469100 | 1.01159000  | 0.90416000  |
| H                                                                                                               | -0.99395000 | 0.80607500  | 1.93178700  | H                                                                                                                 | -1.15316600 | 1.37426500  | 1.80459200  |
| C                                                                                                               | -1.80796500 | -0.45291200 | -1.09024000 | H                                                                                                                 | -1.84489400 | 1.90257700  | 0.27560200  |
| H                                                                                                               | -1.53380200 | 0.00891400  | -2.04981600 | H                                                                                                                 | -2.65918300 | 0.63904400  | 1.18844200  |
| H                                                                                                               | -1.69052700 | -1.53757500 | -1.23893600 | C                                                                                                                 | 1.66467700  | 1.01160600  | -0.90415500 |
| H                                                                                                               | -2.87069100 | -0.25298200 | -0.90112700 | H                                                                                                                 | 1.15314100  | 1.37427400  | -1.80458400 |
| C                                                                                                               | 1.62699200  | -1.30869500 | 0.39365400  | H                                                                                                                 | 1.84486900  | 1.90259600  | -0.27559900 |
| H                                                                                                               | 1.16266100  | -1.94034100 | 1.16172900  | H                                                                                                                 | 2.65917300  | 0.63907300  | -1.18844200 |
| H                                                                                                               | 1.65776500  | -1.92795900 | -0.52220200 | C                                                                                                                 | 1.66501700  | -1.01158300 | 0.90398200  |
| H                                                                                                               | 2.67565900  | -1.12489400 | 0.66653900  | H                                                                                                                 | 1.15354900  | -1.37493300 | 1.80416600  |
| C                                                                                                               | 1.64417000  | 1.24443800  | -0.52613100 | H                                                                                                                 | 1.84591300  | -1.90217400 | 0.27505900  |
| H                                                                                                               | 1.10458900  | 1.91875000  | -1.20272300 | H                                                                                                                 | 2.65923900  | -0.63855200 | 1.18858500  |
| H                                                                                                               | 1.88490600  | 1.84731400  | 0.36976300  | C                                                                                                                 | -1.66500300 | -1.01158400 | -0.90399100 |
| H                                                                                                               | 2.61224900  | 0.98479700  | -0.97742700 | H                                                                                                                 | -1.15352300 | -1.37492600 | -1.80417100 |
|                                                                                                                 |             |             |             | H                                                                                                                 | -1.84590900 | -1.90217900 | -0.27507700 |
|                                                                                                                 |             |             |             | H                                                                                                                 | -2.65922000 | -0.63854900 | -1.18860400 |
| <br>SCF energy =-273.7172393 |             |             |             | <br>SCF energy=-257.6401357  |             |             |             |
| B                                                                                                               | 0.85885300  | 0.00002700  | 0.00000200  | B                                                                                                                 | 0.83546700  | -0.07526700 | 0.01992200  |
| B                                                                                                               | -0.85885700 | -0.00002000 | 0.00001400  | B                                                                                                                 | -0.88014300 | 0.04841400  | -0.00697300 |
| N                                                                                                               | -1.58094400 | -1.15005400 | -0.44873700 |                                                                                                                   |             |             |             |
| H                                                                                                               | -2.59120000 | -1.21522600 | -0.49625700 |                                                                                                                   |             |             |             |

|                                                                                     |             |             |             |                                                                                       |             |             |             |
|-------------------------------------------------------------------------------------|-------------|-------------|-------------|---------------------------------------------------------------------------------------|-------------|-------------|-------------|
| H                                                                                   | -1.11923400 | -1.93841300 | -0.87912400 | N                                                                                     | -1.53614500 | 1.23652700  | 0.43924300  |
| N                                                                                   | -1.58103000 | 1.14996900  | 0.44877100  | H                                                                                     | -2.54061600 | 1.36676200  | 0.46901600  |
| H                                                                                   | -2.59129800 | 1.21521400  | 0.49595500  | H                                                                                     | -1.03044100 | 2.03995000  | 0.78278200  |
| H                                                                                   | -1.11938900 | 1.93842200  | 0.87906000  | N                                                                                     | -1.67338000 | -1.05410600 | -0.46194600 |
| N                                                                                   | 1.58094900  | 1.15006700  | -0.44869400 | H                                                                                     | -2.68394300 | -1.04096000 | -0.54097200 |
| H                                                                                   | 2.59120800  | 1.21524900  | -0.49611800 | H                                                                                     | -1.26412200 | -1.87650600 | -0.88140400 |
| H                                                                                   | 1.11928500  | 1.93828000  | -0.87939400 | N                                                                                     | 1.41804600  | -1.28005600 | 0.46997600  |
| N                                                                                   | 1.58101900  | -1.14995600 | 0.44880400  | H                                                                                     | 2.41950500  | -1.43425500 | 0.52292700  |
| H                                                                                   | 2.59129400  | -1.21536500 | 0.49561800  | H                                                                                     | 0.88175400  | -2.06319500 | 0.82301800  |
| H                                                                                   | 1.11939100  | -1.93837600 | 0.87917000  | C                                                                                     | 1.80905900  | 1.09635600  | -0.44373000 |
| 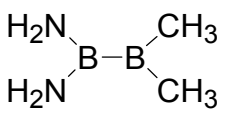   |             |             |             | H                                                                                     | 1.62251500  | 1.36974000  | -1.49284900 |
| SCF energy=-241.5473718                                                             |             |             |             | H                                                                                     | 1.62498000  | 2.01640800  | 0.13213100  |
| B                                                                                   | 0.81511500  | -0.00002600 | 0.00001900  | H                                                                                     | 2.87974700  | 0.86162700  | -0.34792300 |
| B                                                                                   | -0.90952100 | -0.00003600 | 0.00000400  |    |             |             |             |
| N                                                                                   | -1.62901100 | -1.19070600 | -0.32350700 | SCF energy=-241.5637118                                                               |             |             |             |
| H                                                                                   | -2.63776500 | -1.26272000 | -0.38686200 | B                                                                                     | -0.85772400 | -0.04631500 | -0.03265800 |
| H                                                                                   | -1.16324100 | -2.06239800 | -0.53007300 | B                                                                                     | 0.85786100  | -0.04610500 | 0.03304900  |
| N                                                                                   | -1.62888400 | 1.19071900  | 0.32352300  | N                                                                                     | 1.53268800  | -1.08715300 | 0.70875900  |
| H                                                                                   | -2.63762400 | 1.26285700  | 0.38697000  | H                                                                                     | 2.54248600  | -1.13128500 | 0.80094100  |
| H                                                                                   | -1.16299400 | 2.06235800  | 0.53004400  | H                                                                                     | 1.06451200  | -1.85041800 | 1.18129800  |
| C                                                                                   | 1.64221500  | -1.31413800 | 0.30805300  | N                                                                                     | -1.53182100 | -1.08747100 | -0.70894700 |
| H                                                                                   | 1.80651100  | -1.31393700 | 1.40189200  | H                                                                                     | -1.06314000 | -1.85046100 | -1.18143700 |
| H                                                                                   | 1.13610400  | -2.26332000 | 0.08795700  | H                                                                                     | -2.54155400 | -1.13194900 | -0.80173000 |
| H                                                                                   | 2.64412100  | -1.33472700 | -0.14381300 | C                                                                                     | -1.74124600 | 1.09910500  | 0.63508400  |
| C                                                                                   | 1.64209800  | 1.31414900  | -0.30807500 | H                                                                                     | -1.53734700 | 1.18317000  | 1.71300700  |
| H                                                                                   | 1.80636900  | 1.31386900  | -1.40192100 | H                                                                                     | -1.48705300 | 2.08272100  | 0.21258800  |
| H                                                                                   | 1.13592400  | 2.26331100  | -0.08805300 | H                                                                                     | -2.82621800 | 0.95975500  | 0.51530000  |
| H                                                                                   | 2.64401500  | 1.33485700  | 0.14376500  | C                                                                                     | 1.74034800  | 1.09995400  | -0.63499200 |
|  |             |             |             | H                                                                                     | 1.53654900  | 1.18308500  | -1.71300700 |
| SCF energy=-225.4720442                                                             |             |             |             | H                                                                                     | 1.48493100  | 2.08354000  | -0.21315700 |
| B                                                                                   | -0.83454100 | -0.00963400 | -0.01905600 | H                                                                                     | 2.82547400  | 0.96195600  | -0.51499400 |
| B                                                                                   | 0.86839100  | -0.04580800 | -0.06570200 |  |             |             |             |
| N                                                                                   | 1.57452900  | -0.75642800 | -1.06089800 | SCF energy=-449.3030824                                                               |             |             |             |
| H                                                                                   | 1.14101400  | -1.28243700 | -1.80898900 | B                                                                                     | 0.00000000  | 0.00000000  | 0.86367300  |
| H                                                                                   | 2.58778000  | -0.79022600 | -1.10200900 | B                                                                                     | 0.00000000  | 0.00000000  | -0.86367300 |
| C                                                                                   | -1.65230700 | 1.16971200  | -0.69103800 | F                                                                                     | 0.00000000  | -1.13309400 | -1.55436200 |
| H                                                                                   | -1.71595500 | 1.96478000  | 0.07520800  | F                                                                                     | 0.00000000  | 1.13309400  | -1.55436200 |
| H                                                                                   | -1.17864000 | 1.63524300  | -1.56471400 | F                                                                                     | 0.00000000  | 1.13309400  | 1.55436200  |
| H                                                                                   | -2.69143000 | 0.91212500  | -0.94112800 | F                                                                                     | 0.00000000  | -1.13309400 | 1.55436200  |
| C                                                                                   | -1.65409600 | -1.12944600 | 0.74657400  |  |             |             |             |
| H                                                                                   | -1.84307000 | -1.92363100 | -0.00005900 | SCF energy=-1890.7313303                                                              |             |             |             |
| H                                                                                   | -1.12385400 | -1.62056500 | 1.57231600  | B                                                                                     | 0.00000000  | 0.00000000  | -0.84625900 |
| H                                                                                   | -2.64407900 | -0.80618100 | 1.09878100  | B                                                                                     | 0.00000000  | 0.00000000  | 0.84625900  |
| C                                                                                   | 1.72221500  | 0.73465500  | 1.03483300  | Cl                                                                                    | -1.07298700 | -1.07431000 | 1.73444600  |
| H                                                                                   | 1.51111400  | 1.81399800  | 1.00697500  | Cl                                                                                    | 1.07298700  | 1.07431000  | 1.73444600  |
| H                                                                                   | 1.46170200  | 0.40846100  | 2.05238500  | Cl                                                                                    | -1.07298700 | 1.07431000  | -1.73444600 |
| H                                                                                   | 2.80960000  | 0.61111200  | 0.91909300  | Cl                                                                                    | 1.07298700  | -1.07431000 | -1.73444600 |
|  |             |             |             |  |             |             |             |
| SCF energy=-1645.069131                                                             |             |             |             | SCF energy=-1286.1523706                                                              |             |             |             |
| B                                                                                   | -0.84773700 | -0.01667400 | -0.01346000 | B                                                                                     | -0.65344000 | 0.01155600  | -0.07849800 |
| B                                                                                   | 0.84773800  | 0.01667300  | -0.01346100 | B                                                                                     | 1.00625900  | 0.14382300  | -0.37751800 |
| H                                                                                   | -3.00271900 | 1.00400600  | -0.56004000 | H                                                                                     | -2.73184600 | -1.28286800 | 0.02701400  |
| H                                                                                   | 0.77182200  | 2.13699500  | 1.14842000  | H                                                                                     | 1.39461600  | -0.75295000 | 1.86948500  |
| H                                                                                   | 3.00272300  | -1.00397900 | -0.56007800 | H                                                                                     | -0.69785100 | 2.38439800  | 0.45257900  |
| H                                                                                   | -0.77182900 | -2.13698100 | 1.14845200  | C                                                                                     | 1.58855900  | 0.68847800  | -1.74104500 |
| S                                                                                   | 1.80037500  | 1.35880400  | 0.74726900  | H                                                                                     | 1.29077000  | 0.01512200  | -2.55909400 |
| S                                                                                   | 1.71951800  | -1.37564700 | -0.77983200 | H                                                                                     | 1.14766300  | 1.66377100  | -1.99308900 |
| S                                                                                   | -1.80038000 | -1.35880600 | 0.74726300  |                                                                                       |             |             |             |
| S                                                                                   | -1.71951300 | 1.37564700  | -0.77983500 |                                                                                       |             |             |             |



|                                                                                                                                                                                                                                                                                                                                                                                                                                                                                                                                                                                                                                                         |                                                                                                                  |  |  |                                                                                                                                                            |
|---------------------------------------------------------------------------------------------------------------------------------------------------------------------------------------------------------------------------------------------------------------------------------------------------------------------------------------------------------------------------------------------------------------------------------------------------------------------------------------------------------------------------------------------------------------------------------------------------------------------------------------------------------|------------------------------------------------------------------------------------------------------------------|--|--|------------------------------------------------------------------------------------------------------------------------------------------------------------|
| 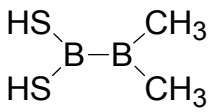<br>SCF energy=-927.2266675                                                                                                                                                                                                                                                                                                                                                                                                                                                                                                                                            |                                                                                                                  |  |  | H 2.68006800 0.78965400 -1.77059000<br>S -1.66104700 1.43678800 0.43302200<br>S -1.45158100 -1.60446500 -0.27673400<br>S 2.21394800 -0.31512900 0.88746600 |
| B -0.36303900 -0.00239500 0.00008400<br>B 1.33199500 0.01966900 -0.00008600<br>H -2.53048200 -1.16133600 -0.00196400<br>H -0.32688100 2.43709600 0.00212700<br>C 2.11944300 -0.01209500 1.36986900<br>H 1.61087200 0.49563000 2.19933700<br>H 2.17361700 -1.07387600 1.67192200<br>H 3.15393900 0.34939000 1.30733900<br>C 2.11953200 -0.00556100 -1.37003200<br>H 2.19182800 -1.06861800 -1.66413900<br>H 1.60461300 0.48874300 -2.20347500<br>H 3.14845200 0.37173000 -1.30801000<br>S -1.33653100 1.53740800 0.00152500<br>S -1.24500600 -1.58860800 -0.00165900                                                                                     | <br>SCF energy=-927.2350775   |  |  |                                                                                                                                                            |
| B 0.81005100 -0.32649000 0.23641700<br>B -0.81005000 -0.32648700 -0.23641700<br>H -1.22667400 1.43513300 1.42981600<br>H 1.22665800 1.43515600 -1.42979300<br>C 1.38363400 -1.27896400 1.36229700<br>H 0.84287000 -1.12149200 2.30716300<br>H 1.20144800 -2.33038100 1.09375500<br>H 2.45580700 -1.16586700 1.56436400<br>C -1.38362100 -1.27895100 -1.36231200<br>H -0.84286400 -1.12145000 -2.30717700<br>H -1.20141700 -2.33037100 -1.09379400<br>H -2.45579700 -1.16586700 -1.56437300<br>S -2.01432400 0.78054000 0.54651900<br>S 2.01431600 0.78055400 -0.54651100                                                                                | <br>SCF energy=-568.3091519    |  |  |                                                                                                                                                            |
| B -1.13982200 -0.00697700 -0.00488800<br>B 0.49901900 0.39057100 -0.05420700<br>H 1.02831200 -1.99378900 0.30168500<br>C 1.03789800 1.86659600 -0.25939000<br>H 0.61515600 2.30785000 -1.17392300<br>H 0.68998400 2.50732100 0.56507100<br>H 2.12972900 1.96013400 -0.31474500<br>C -1.95635400 0.07197500 1.34954400<br>H -1.36998000 -0.07156600 2.26531100<br>H -2.35355100 1.10240000 1.40231400<br>H -2.83380100 -0.58898200 1.37878300<br>C -1.90392900 -0.45899900 -1.31704900<br>H -1.48997100 -0.08120800 -2.26000700<br>H -1.81003200 -1.55916900 -1.36568600<br>H -2.98277700 -0.25155400 -1.29136900<br>S 1.78220400 -0.88292700 0.13433800 | <br>SCF energy=-313.4707099 |  |  |                                                                                                                                                            |
| B -0.86101600 0.01326400 0.01650500<br>B 0.85742700 -0.01377800 0.01358900<br>O -1.54991100 -1.13419000 0.32804200<br>H -2.51245300 -1.00865700 0.26675600<br>O -1.64354200 1.11178200 -0.29989700<br>H -1.13145600 1.87808500 -0.59211000<br>N 1.51047500 -1.24418300 -0.26589100<br>H 2.51330400 -1.38362700 -0.29112200<br>H 0.98598700 -2.09679400 -0.40372400<br>N 1.61499500 1.17970000 0.23723400<br>H 1.20420100 2.03676500 0.57903300<br>H 2.62769900 1.20743800 0.26613600                                                                                                                                                                    | <br>SCF energy=-313.4696688   |  |  |                                                                                                                                                            |
| B 0.85929200 -0.06277000 -0.00140200<br>B -0.85929400 0.06272100 -0.00139100<br>O -1.53770700 1.17768700 -0.48421700<br>H -0.94760300 1.84370800 -0.85985500<br>O 1.53781900 -1.17773600 -0.48405500<br>H 0.94788000 -1.84341300 -0.86055800<br>N 1.68602900 0.98553900 0.47316700<br>H 1.33639400 1.80810200 0.94336000<br>H 2.69747500 0.91086200 0.48484500<br>N -1.68615200 -0.98555100 0.47306900<br>H -1.33661200 -1.80800400 0.94352300<br>H -2.69756600 -0.91053900 0.48517200                                                                                                                                                                  | <br>SCF energy=-333.3474872 |  |  |                                                                                                                                                            |
| B 0.85292600 -0.07553000 -0.00002400<br>B -0.86793300 0.02694200 0.00000700<br>O 1.50441600 1.13634600 -0.00019800<br>H 2.47270100 1.04869600 -0.00015200<br>O -1.45140000 1.28093000 0.00017000<br>H -0.78341200 1.98225800 0.00025600<br>O 1.66063600 -1.19395400 0.00016200<br>H 1.18433100 -2.03448200 0.00034500<br>N -1.75342900 -1.07738100 -0.00013300<br>H -1.47426700 -2.04712500 -0.00041800<br>H -2.75953500 -0.95131500 -0.00009300                                                                                                                                                                                                        | <br>SCF energy=-293.5921463   |  |  |                                                                                                                                                            |
| B -0.86594200 -0.01875300 -0.00566200<br>B 0.85145600 0.02007600 -0.01919000<br>O 1.44764000 1.25115500 -0.27379800<br>H 2.41701000 1.25275400 -0.24032800<br>N -1.59609300 -1.23338400 -0.20468700<br>H -2.60732600 -1.29245400 -0.22702500<br>H -1.15553800 -2.09363900 -0.49652900<br>N -1.55517100 1.20155000 0.24164700                                                                                                                                                                                                                                                                                                                            | <br>SCF energy=-361.5230735 |  |  |                                                                                                                                                            |
| B 0.85140600 -0.09125300 -0.00005300<br>B -0.85150100 0.09170000 -0.00004000<br>N 1.73771900 0.99325300 0.00000900<br>H 2.74653100 0.89370900 0.00007200<br>H 1.41491500 1.95175700 0.00037500<br>N -1.73695900 -0.99348400 0.00000200<br>H -1.41312300 -1.95164700 0.00027600<br>H -2.74587100 -0.89502600 0.00018700<br>F -1.39674800 1.34538400 -0.00003500                                                                                                                                                                                                                                                                                          |                                                                                                                  |  |  |                                                                                                                                                            |

|                                                                                     |             |             |                          |                                                                                       |             |             |                          |
|-------------------------------------------------------------------------------------|-------------|-------------|--------------------------|---------------------------------------------------------------------------------------|-------------|-------------|--------------------------|
| H                                                                                   | -2.56097000 | 1.31705000  | 0.26411600               | F                                                                                     | 1.39593800  | -1.34531900 | -0.00002300              |
| H                                                                                   | -1.04947800 | 2.06952300  | 0.35151700               |                                                                                       |             |             |                          |
| N                                                                                   | 1.65483300  | -1.12744200 | 0.23440800               | 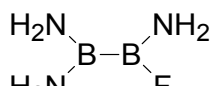   |             |             |                          |
| H                                                                                   | 2.66888000  | -1.14044000 | 0.25434200               |                                                                                       |             |             |                          |
| H                                                                                   | 1.25375000  | -2.01372300 | 0.50897900               |                                                                                       |             |             |                          |
|    |             |             |                          |                                                                                       |             |             |                          |
|                                                                                     |             |             | SCF energy=-405.4147637  |                                                                                       |             |             | SCF energy=-317.6198949  |
| B                                                                                   | -0.84598200 | -0.07991600 | -0.00004700              | B                                                                                     | -0.86345500 | -0.04538000 | -0.00196800              |
| B                                                                                   | 0.86978200  | 0.01040000  | -0.00002300              | B                                                                                     | 0.85103300  | 0.02987200  | -0.01590400              |
| N                                                                                   | -1.63028500 | 1.07795100  | 0.00004100               | N                                                                                     | -1.56955600 | -1.27778700 | -0.15419400              |
| H                                                                                   | -2.64425600 | 1.06046600  | 0.00001200               | H                                                                                     | -2.57947500 | -1.35684600 | -0.16586400              |
| H                                                                                   | -1.23367500 | 2.00856400  | 0.00006300               | H                                                                                     | -1.11420700 | -2.14970600 | -0.38083400              |
| F                                                                                   | 1.49075500  | 1.19758000  | -0.00002500              | F                                                                                     | 1.45124800  | 1.24621200  | -0.22162800              |
| F                                                                                   | -1.46994100 | -1.28202500 | -0.00001600              | N                                                                                     | -1.57042000 | 1.17439600  | 0.18917200               |
| F                                                                                   | 1.66484400  | -1.05634500 | 0.00004000               | H                                                                                     | -2.57818900 | 1.27033600  | 0.21610000               |
|                                                                                     |             |             |                          | H                                                                                     | -1.08546700 | 2.05629800  | 0.27883100               |
|                                                                                     |             |             |                          | N                                                                                     | 1.73687800  | -1.04560300 | 0.18568300               |
|                                                                                     |             |             |                          | H                                                                                     | 2.74445500  | -0.93145100 | 0.18401000               |
|                                                                                     |             |             |                          | H                                                                                     | 1.43544600  | -1.98404200 | 0.40714600               |
|    |             |             |                          |    |             |             |                          |
|                                                                                     |             |             | SCF energy=-1082.2486222 |                                                                                       |             |             | SCF energy=-1486.4888125 |
| B                                                                                   | -0.71331700 | -0.46629600 | 0.00021600               | B                                                                                     | -0.91478300 | 0.59316900  | -0.00001500              |
| B                                                                                   | 0.71330700  | 0.46628800  | 0.00002600               | B                                                                                     | 0.65980100  | -0.07990800 | 0.00000100               |
| N                                                                                   | -0.70853900 | -1.85830700 | -0.00010300              | N                                                                                     | -1.09567800 | 1.97459600  | -0.00005000              |
| H                                                                                   | -1.54289900 | -2.43301000 | -0.00028700              | H                                                                                     | -2.00454800 | 2.42338800  | -0.00006400              |
| H                                                                                   | 0.15882000  | -2.38252800 | 0.00095000               | H                                                                                     | -0.31463900 | 2.62019800  | -0.00006600              |
| N                                                                                   | 0.70852700  | 1.85834300  | 0.00015600               | Cl                                                                                    | -2.36922600 | -0.45149800 | 0.00002900               |
| H                                                                                   | -0.15882500 | 2.38257600  | -0.00032100              | Cl                                                                                    | 0.96168400  | -1.80946100 | -0.00002600              |
| H                                                                                   | 1.54288600  | 2.43304400  | -0.00029900              | Cl                                                                                    | 2.07012100  | 1.00025000  | 0.00002900               |
| Cl                                                                                  | -2.32341000 | 0.36090400  | -0.00003800              |                                                                                       |             |             |                          |
| Cl                                                                                  | 2.32341900  | -0.36092100 | -0.00005800              |  |             |             |                          |
|                                                                                     |             |             |                          |                                                                                       |             |             | SCF energy=-329.3392881  |
|  |             |             |                          | B                                                                                     | 0.01487900  | 0.86201400  | -0.03159500              |
|                                                                                     |             |             | SCF energy=-677.9825222  | B                                                                                     | -0.01487900 | -0.86201400 | -0.03159500              |
| B                                                                                   | -1.18209500 | -0.15837000 | -0.00554400              | F                                                                                     | -0.96505000 | -1.45225100 | -0.79669900              |
| B                                                                                   | 0.41357700  | 0.45793600  | -0.06846000              | F                                                                                     | 0.96505000  | 1.45225100  | -0.79669900              |
| N                                                                                   | -2.26489100 | 0.69875100  | 0.36441300               | C                                                                                     | -0.96505000 | 1.80593200  | 0.75349400               |
| H                                                                                   | -3.22838500 | 0.39449600  | 0.43991900               | H                                                                                     | -1.93797900 | 1.80449700  | 0.23462600               |
| H                                                                                   | -2.12520100 | 1.62507900  | 0.74112900               | H                                                                                     | -1.17549000 | 1.45067100  | 1.77123000               |
| N                                                                                   | -1.42133100 | -1.51272000 | -0.36286800              | H                                                                                     | -0.61609400 | 2.84467200  | 0.80144400               |
| H                                                                                   | -2.32788000 | -1.96349300 | -0.36508000              | C                                                                                     | 0.96505000  | -1.80593200 | 0.75349400               |
| H                                                                                   | -0.66623300 | -2.14065000 | -0.60092600              | H                                                                                     | 1.93797900  | -1.80449700 | 0.23462600               |
| N                                                                                   | 0.73146000  | 1.79331200  | -0.34348800              | H                                                                                     | 1.17549000  | -1.45067100 | 1.77123000               |
| H                                                                                   | 1.67934700  | 2.14892900  | -0.39504700              | H                                                                                     | 0.61609400  | -2.84467200 | 0.80144400               |
| H                                                                                   | 0.02560000  | 2.47963900  | -0.57870500              |                                                                                       |             |             |                          |
| Cl                                                                                  | 1.83345100  | -0.64101400 | 0.20719600               |  |             |             |                          |
|                                                                                     |             |             |                          |                                                                                       |             |             | SCF energy=-389.322592   |
|  |             |             |                          | B                                                                                     | -0.82665300 | 0.11243200  | 0.00328600               |
|                                                                                     |             |             | SCF energy=-269.3615151  | B                                                                                     | 0.89037000  | -0.03532500 | -0.00076900              |
| B                                                                                   | 0.83535000  | 0.01337400  | -0.03096300              | C                                                                                     | -1.83393300 | -1.08616800 | -0.03258300              |
| B                                                                                   | -0.86317000 | -0.04602400 | 0.08619200               | H                                                                                     | -1.66537900 | -1.70604100 | -0.92619800              |
| C                                                                                   | 1.65268000  | -1.28036300 | -0.42892500              | H                                                                                     | -1.66547200 | -1.75820100 | 0.82249100               |
| H                                                                                   | 1.83721700  | -1.81344300 | 0.52221600               | H                                                                                     | -2.88217800 | -0.76607600 | -0.02319400              |
| H                                                                                   | 1.12815400  | -1.99721600 | -1.07297900              | F                                                                                     | 1.59756200  | -0.06552100 | -1.13294400              |
| H                                                                                   | 2.64217500  | -1.07087600 | -0.85785200              | F                                                                                     | -1.31580300 | 1.36776500  | 0.04035400               |
| C                                                                                   | 1.62212400  | 1.35705300  | 0.24584600               | F                                                                                     | 1.59580100  | -0.15093500 | 1.12701300               |
| H                                                                                   | 1.63106900  | 1.90750400  | -0.71318500              |                                                                                       |             |             |                          |
| H                                                                                   | 1.15733100  | 2.03409500  | 0.97352100               |  |             |             |                          |
| H                                                                                   | 2.67538300  | 1.20682300  | 0.51935800               |                                                                                       |             |             | SCF energy=-629.725515   |
| C                                                                                   | -1.91109900 | 0.33565300  | -1.02846600              | B                                                                                     | 1.13176200  | 0.03812400  | -0.01656500              |
| H                                                                                   | -2.25560700 | 1.36571900  | -0.83729300              | B                                                                                     | -0.51289500 | 0.40577000  | -0.09465000              |
| H                                                                                   | -1.51212700 | 0.32109200  | -2.04957900              | C                                                                                     | 1.89569200  | -0.48801200 | -1.29827600              |
| H                                                                                   | -2.80466200 | -0.30192000 | -0.98544000              |                                                                                       |             |             |                          |
| F                                                                                   | -1.39356200 | -0.44028700 | 1.27715100               |                                                                                       |             |             |                          |

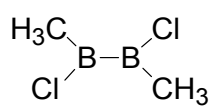

SCF energy=-1050.0654197

|    |             |             |             |
|----|-------------|-------------|-------------|
| B  | -0.05691300 | 0.84455300  | 0.33838200  |
| B  | 0.05691300  | -0.84455300 | 0.33838200  |
| C  | -1.09345300 | 1.69826800  | 1.14567900  |
| H  | -2.01548200 | 1.74208200  | 0.54125000  |
| H  | -1.38118600 | 1.24083000  | 2.10072900  |
| H  | -0.77508400 | 2.73245100  | 1.31924100  |
| C  | 1.09345300  | -1.69826800 | 1.14567900  |
| H  | 2.01548200  | -1.74208200 | 0.54125000  |
| H  | 1.38118600  | -1.24083000 | 2.10072900  |
| H  | 0.77508400  | -2.73245100 | 1.31924100  |
| Cl | -1.09345300 | -1.69710800 | -0.73689400 |
| Cl | 1.09345300  | 1.69710800  | -0.73689400 |

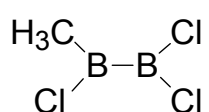

SCF energy=-1470.3992096

|    |             |             |             |
|----|-------------|-------------|-------------|
| B  | -1.00859900 | 0.00355000  | 0.41155900  |
| B  | 0.65274800  | 0.00139200  | 0.07986600  |
| C  | -1.63242500 | 0.09885000  | 1.84333000  |
| H  | -1.06035900 | -0.46647300 | 2.59041500  |
| H  | -1.57901000 | 1.15391900  | 2.16121300  |
| H  | -2.68468300 | -0.20228500 | 1.88794800  |
| Cl | -2.08076200 | -0.06075400 | -1.00921200 |
| Cl | 1.54271400  | -1.51897600 | -0.02903700 |
| Cl | 1.53203900  | 1.51484900  | -0.14743800 |

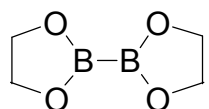

SCF energy=-508.0108888

|   |             |             |             |
|---|-------------|-------------|-------------|
| B | 0.00000000  | 0.00000000  | -0.85177500 |
| B | 0.00000000  | 0.00000000  | 0.85167100  |
| O | 0.00000000  | 1.14560800  | 1.61282600  |
| O | 0.00000000  | -1.14560800 | 1.61282600  |
| C | 0.07365900  | 0.77003800  | 3.00415500  |
| H | 1.03885500  | 1.10335600  | 3.40066300  |
| C | -0.07365900 | -0.77003800 | 3.00415500  |
| O | -1.14211100 | -0.08935900 | -1.61311100 |
| O | 1.14211100  | 0.08935900  | -1.61311100 |
| C | -0.77318500 | 0.01915200  | -3.00394300 |
| C | 0.77318500  | -0.01915200 | -3.00394300 |
| H | 1.22405900  | 0.81236000  | -3.55342100 |
| H | -0.72753900 | 1.27843300  | 3.54852900  |
| H | 1.17343600  | -0.96113400 | -3.39450400 |
| H | -1.22405900 | -0.81236000 | -3.55342100 |
| H | -1.17343600 | 0.96113400  | -3.39450400 |
| H | 0.72753900  | -1.27843300 | 3.54852900  |
| H | -1.03885500 | -1.10335600 | 3.40066300  |

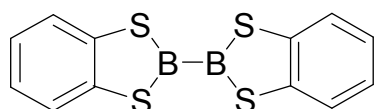

SCF energy=-2104.7940281

|   |             |             |             |
|---|-------------|-------------|-------------|
| B | 0.00001800  | 0.84014300  | 0.00003900  |
| B | -0.00001800 | -0.84014300 | 0.00003900  |
| S | 0.53843400  | -1.84287000 | 1.40339400  |
| S | -0.53850300 | -1.84282300 | -1.40334200 |
| S | -0.53843400 | 1.84287000  | 1.40339400  |
| S | 0.53850300  | 1.84282300  | -1.40334200 |
| C | 0.25243200  | 3.42563800  | -0.65722300 |
| C | 0.50773600  | 4.63871600  | -1.31185100 |
| C | 0.25341500  | 5.84031100  | -0.65399500 |
| C | -0.25350300 | 5.84033000  | 0.65390700  |
| C | -0.50773600 | 4.63874400  | 1.31180600  |

|    |             |             |             |
|----|-------------|-------------|-------------|
| H  | 1.77445100  | -1.58620400 | -1.28790300 |
| H  | 1.49714900  | -0.15162900 | -2.26330600 |
| H  | 2.97776000  | -0.30062000 | -1.27284000 |
| C  | 1.93379800  | 0.20511600  | 1.33697700  |
| H  | 2.29673100  | 1.24913300  | 1.35086200  |
| H  | 1.34351100  | 0.07837700  | 2.25262300  |
| H  | 2.82909300  | -0.42831000 | 1.39916500  |
| C  | -1.17991400 | 1.80572500  | -0.34542200 |
| H  | -1.45881000 | 2.22262300  | 0.63694900  |
| H  | -0.51271000 | 2.53500800  | -0.82058300 |
| H  | -2.10957100 | 1.73906800  | -0.92465000 |
| Cl | -1.62525800 | -0.98317000 | 0.19565200  |

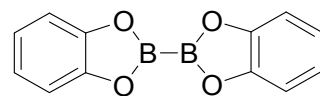

SCF energy=-812.8733548

|   |             |             |             |
|---|-------------|-------------|-------------|
| B | 0.00000100  | -0.84339600 | 0.00022100  |
| B | -0.00000100 | 0.84339600  | 0.00022100  |
| O | -1.14464600 | 1.63578100  | 0.00024900  |
| O | 1.14464200  | 1.63584100  | 0.00013200  |
| O | 1.14464600  | -1.63578100 | 0.00024900  |
| O | -1.14464200 | -1.63584100 | 0.00013200  |
| C | 0.69758300  | -2.94145400 | 0.00019800  |
| C | 1.43441600  | -4.11513300 | 0.00025700  |
| C | 0.70154800  | -5.31160000 | -0.00019300 |
| C | -0.70157800 | -5.31156700 | -0.00044800 |
| C | -1.43441600 | -4.11510100 | -0.00025400 |
| C | -0.69753400 | -2.94146700 | -0.00006200 |
| H | 2.51964700  | -4.10293100 | 0.00037000  |
| H | 1.23430900  | -6.25834400 | -0.00033700 |
| H | -2.51964900 | -4.10278400 | -0.00042500 |
| C | 0.70157800  | 5.31156700  | -0.00044800 |
| C | 1.43441600  | 4.11510100  | -0.00025400 |
| C | 0.69753400  | 2.94146700  | -0.00006200 |
| C | -0.69758300 | 2.94145400  | 0.00019800  |
| C | -1.43441600 | 4.11513300  | 0.00025700  |
| C | -0.70154800 | 5.31160000  | -0.00019300 |
| H | 2.51964900  | 4.10278400  | -0.00042500 |
| H | -2.51964700 | 4.10293100  | 0.00037000  |
| H | -1.23430900 | 6.25834400  | -0.00033700 |
| H | 1.23434400  | 6.25830200  | -0.00074300 |
| H | -1.23434400 | -6.25830200 | -0.00074300 |

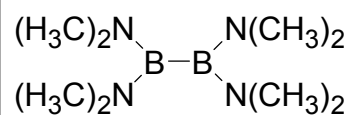

SCF energy=-588.1503337

|   |             |             |             |
|---|-------------|-------------|-------------|
| B | 0.87006600  | 0.00021000  | -0.00015700 |
| B | -0.87009800 | 0.00021000  | 0.00014400  |
| N | 1.57547000  | -1.02096500 | -0.73529000 |
| N | -1.57546900 | -1.02106600 | 0.73516500  |
| C | 0.91814200  | -1.82862800 | -1.75242900 |
| H | 1.42253200  | -1.72931700 | -2.72766900 |
| H | 0.92921100  | -2.89857500 | -1.48527600 |
| H | -0.12117400 | -1.51797400 | -1.87961500 |
| C | 2.94169000  | -1.46945800 | -0.50306500 |
| H | 2.95998200  | -2.56662500 | -0.40701200 |
| H | 3.62541000  | -1.20701500 | -1.32821000 |
| H | 3.33955300  | -1.05276900 | 0.42337500  |
| C | -0.91808600 | -1.82866900 | 1.75231400  |
| H | -1.42201500 | -1.72884400 | 2.72774600  |
| H | -0.92973000 | -2.89868900 | 1.48549800  |
| H | 0.12142000  | -1.51842000 | 1.87896600  |
| C | -2.94175800 | -1.46942200 | 0.50316500  |
| H | -2.96019800 | -2.56660500 | 0.40732200  |
| H | -3.62538900 | -1.20674900 | 1.32831700  |

|   |             |             |             |
|---|-------------|-------------|-------------|
| C | -0.25235300 | 3.42566400  | 0.65721500  |
| H | 0.89919700  | 4.63691800  | -2.32542600 |
| H | 0.44958700  | 6.78133000  | -1.16055400 |
| H | -0.44971000 | 6.78136500  | 1.16042200  |
| H | -0.89920300 | 4.63694100  | 2.32537800  |
| C | -0.25341500 | -5.84031100 | -0.65399500 |
| C | -0.50773600 | -4.63871600 | -1.31185100 |
| C | -0.25243200 | -3.42563800 | -0.65722300 |
| C | 0.25235300  | -3.42566400 | 0.65721500  |
| C | 0.50773600  | -4.63874400 | 1.31180600  |
| C | 0.25350300  | -5.84033000 | 0.65390700  |
| H | 0.44958700  | -6.78133000 | -1.16055400 |
| H | -0.89919700 | -4.63691800 | -2.32542600 |
| H | 0.89920300  | -4.63694100 | 2.32537800  |
| H | 0.44971000  | -6.78136500 | 1.16042200  |

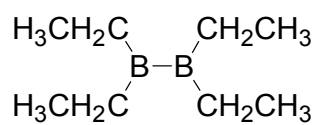

SCF energy= -366.6410246

|   |             |             |             |
|---|-------------|-------------|-------------|
| B | 0.84625700  | 0.14245200  | -0.05326500 |
| B | -0.83803200 | 0.15920000  | 0.07871500  |
| C | 1.69354800  | 1.05439200  | 0.94455900  |
| H | 1.16979500  | 2.00463600  | 1.13650100  |
| H | 1.62981000  | 0.52702700  | 1.91595600  |
| C | 1.62265900  | -0.75276900 | -1.11172600 |
| H | 2.38371400  | -1.33282200 | -0.55986200 |
| H | 2.22798600  | -0.06651400 | -1.73076700 |
| C | -1.64204800 | -0.83146100 | 1.02489500  |
| H | -2.32976000 | -0.23282400 | 1.64684900  |
| H | -2.32597100 | -1.39674700 | 0.36504400  |
| C | -1.64929500 | 1.21000400  | -0.80766100 |
| H | -1.15502700 | 2.19377000  | -0.73886300 |
| H | -1.47499300 | 0.91528900  | -1.85910200 |
| C | 3.17319200  | 1.34141000  | 0.62841400  |
| H | 3.75425800  | 0.41743300  | 0.52324000  |
| H | 3.28037000  | 1.90078700  | -0.30976100 |
| H | 3.64613200  | 1.93813300  | 1.41885500  |
| C | -0.86001200 | -1.81256200 | 1.91457200  |
| H | -0.21348300 | -2.46873200 | 1.31739400  |
| H | -0.21557900 | -1.28043200 | 2.62597900  |
| H | -1.52671700 | -2.45797400 | 2.50090000  |
| C | 0.81845500  | -1.69543600 | -2.02309100 |
| H | 0.23982900  | -2.42182600 | -1.43781700 |
| H | 0.10691300  | -1.13973700 | -2.64724600 |
| H | 1.46719000  | -2.26597700 | -2.70020900 |
| C | -3.16173900 | 1.38212100  | -0.57766600 |
| H | -3.70301300 | 0.43803300  | -0.71439300 |
| H | -3.37570300 | 1.73397400  | 0.43945500  |
| H | -3.59543800 | 2.11204800  | -1.27318100 |

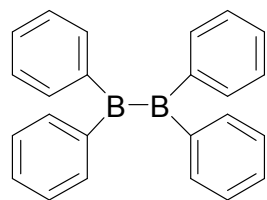

SCF energy= -976.3392887

|   |             |             |             |
|---|-------------|-------------|-------------|
| B | -0.85019800 | -0.00023600 | -0.00022600 |
| B | 0.85018200  | -0.00013100 | 0.00019100  |
| C | 1.63186600  | 0.95705800  | 0.96972700  |
| C | 1.09054500  | 2.20280800  | 1.36391700  |
| C | 2.87930100  | 0.59537100  | 1.52929700  |
| C | 1.76740400  | 3.05360300  | 2.23904500  |
| H | 0.12948700  | 2.51627500  | 0.96226900  |
| C | 3.54618800  | 1.42555200  | 2.43276600  |
| H | 3.32444000  | -0.36002700 | 1.26278600  |
| C | 2.99592700  | 2.66270100  | 2.78190400  |
| H | 1.33353700  | 4.01386000  | 2.50793900  |

|   |             |             |             |
|---|-------------|-------------|-------------|
| H | -3.33966300 | -1.05286300 | -0.42331600 |
| N | 1.57588800  | 1.02124500  | 0.73474700  |
| N | -1.57585300 | 1.02140000  | -0.73458700 |
| C | 0.91913100  | 1.82895800  | 1.75220800  |
| H | 1.42305000  | 1.72849500  | 2.72758300  |
| H | 0.93148400  | 2.89904700  | 1.48572400  |
| H | -0.12058100 | 1.51937700  | 1.87879300  |
| C | 2.94240200  | 1.46883700  | 0.50255200  |
| H | 3.33973300  | 1.05240000  | -0.42424300 |
| H | 2.96150700  | 2.56604300  | 0.40717700  |
| H | 3.62613100  | 1.20537500  | 1.32737300  |
| C | -2.94247800 | 1.46879900  | -0.50267400 |
| H | -2.96176300 | 2.56601300  | -0.40746600 |
| H | -3.62604600 | 1.20511100  | -1.32755600 |
| H | -3.33987500 | 1.05243700  | 0.42412100  |
| C | -0.91905000 | 1.82902900  | -1.75208600 |
| H | -1.42227900 | 1.72775500  | -2.72774000 |
| H | -0.93231000 | 2.89922700  | -1.48612100 |
| H | 0.12095900  | 1.52009900  | -1.87785300 |

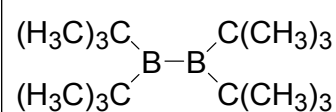

SCF energy= -681.1507897

|   |             |             |             |
|---|-------------|-------------|-------------|
| B | -0.86422700 | -0.01554600 | 0.01443000  |
| B | 0.86416400  | -0.01560900 | -0.01442400 |
| C | 1.68223100  | 1.02953800  | -0.97504500 |
| C | 1.62738300  | -1.06995400 | 0.99020100  |
| C | -1.62740300 | -1.07004400 | -0.99011300 |
| C | -1.68224000 | 1.02970600  | 0.97491700  |
| C | -2.53557200 | -0.30624800 | -1.99243000 |
| H | -2.98374000 | -1.02182500 | -2.69747100 |
| H | -1.97873800 | 0.42644900  | -2.58820900 |
| H | -3.35834500 | 0.21712400  | -1.49579900 |
| C | -0.62565300 | -1.90432600 | -1.82904100 |
| H | -1.15960200 | -2.54107100 | -2.54982400 |
| H | -0.03040700 | -2.57167400 | -1.19694600 |
| H | 0.06580500  | -1.27902500 | -2.40406600 |
| C | -2.52387200 | -2.10248500 | -0.25123300 |
| H | -2.90174300 | -2.83386500 | -0.98069800 |
| H | -3.39102200 | -1.64905700 | 0.23064900  |
| H | -1.97549700 | -2.66686200 | 0.51125200  |
| C | -3.05581100 | 0.55368700  | 1.50756100  |
| H | -3.48646100 | 1.32875500  | 2.15860800  |
| H | -2.97220700 | -0.36098000 | 2.10625600  |
| H | -3.77943800 | 0.37056400  | 0.70755500  |
| C | -1.94817500 | 2.32266000  | 0.14392200  |
| H | -2.49559500 | 3.04097000  | 0.77140900  |
| H | -2.55820200 | 2.13722800  | -0.74513700 |
| H | -1.02713800 | 2.81663300  | -0.17837400 |
| C | -0.86390400 | 1.46314600  | 2.21841300  |
| H | -1.38954800 | 2.26327600  | 2.76009300  |
| H | 0.12707200  | 1.84693100  | 1.95661500  |
| H | -0.72538800 | 0.63811400  | 2.92625500  |
| C | 0.86390400  | 1.46302900  | -2.21853600 |
| H | 1.38957000  | 2.26315200  | -2.76020700 |
| H | -0.12706400 | 1.84684600  | -1.95675900 |
| H | 0.72537600  | 0.63802500  | -2.92640200 |
| C | 1.94845400  | 2.32249000  | -0.14415100 |
| H | 2.49573000  | 3.04076300  | -0.77180700 |
| H | 2.55872000  | 2.13706400  | 0.74474600  |
| H | 1.02754200  | 2.81653000  | 0.17840500  |
| C | 3.05568600  | 0.55330200  | -1.50779600 |
| H | 3.48642600  | 1.32831300  | -2.15885000 |
| H | 2.97186200  | -0.36132300 | -2.10653600 |
| H | 3.77935400  | 0.36999500  | -0.70787300 |
| C | 0.62564100  | -1.90409100 | 1.82928700  |

|   |             |             |             |
|---|-------------|-------------|-------------|
| H | 4.49734600  | 1.11319500  | 2.85778800  |
| H | 3.51896800  | 3.31668400  | 3.47578900  |
| C | 1.63261000  | -0.95712200 | -0.96894000 |
| C | 1.09189400  | -2.20311200 | -1.36321700 |
| C | 2.88015500  | -0.59507700 | -1.52802700 |
| C | 1.76944200  | -3.05380600 | -2.23791200 |
| H | 0.13075800  | -2.51685900 | -0.96197500 |
| C | 3.54774500  | -1.42516100 | -2.43106300 |
| H | 3.32483100  | 0.36052500  | -1.26148100 |
| C | 2.99807600  | -2.66255900 | -2.78026300 |
| H | 1.33602400  | -4.01424800 | -2.50687400 |
| H | 4.49898000  | -1.11252500 | -2.85570600 |
| H | 3.52165000  | -3.31646800 | -3.47381600 |
| C | -1.63186300 | 0.96926000  | -0.95748100 |
| C | -2.87928300 | 1.52886700  | -0.59580800 |
| C | -1.09053100 | 1.36340400  | -2.20323900 |
| C | -3.54614000 | 2.43233800  | -1.42600900 |
| H | -3.32444700 | 1.26237200  | 0.35958500  |
| C | -1.76739100 | 2.23850100  | -3.05407500 |
| H | -0.12946000 | 0.96176100  | -2.51667600 |
| C | -2.99588800 | 2.78141400  | -2.66318400 |
| H | -4.49729000 | 2.85738200  | -1.11365700 |
| H | -1.33351600 | 2.50735900  | -4.01434100 |
| H | -3.51891000 | 3.47528900  | -3.31719200 |
| C | -1.63262300 | -0.96952100 | 0.95659200  |
| C | -2.88012600 | -1.52860600 | 0.59438700  |
| C | -1.09196100 | -1.36395700 | 2.20255200  |
| C | -3.54772500 | -2.43179000 | 1.42430000  |
| H | -3.32476700 | -1.26192900 | -0.36119200 |
| C | -1.76950900 | -2.23882700 | 3.05306600  |
| H | -0.13085400 | -0.96272200 | 2.51640200  |
| C | -2.99810600 | -2.78115900 | 2.66167300  |
| H | -4.49892900 | -2.85642100 | 1.11155000  |
| H | -1.33613000 | -2.50791800 | 4.01349100  |
| H | -3.52168900 | -3.47483000 | 3.31544700  |

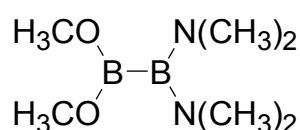

SCF energy=-549.2836958

|   |             |             |             |
|---|-------------|-------------|-------------|
| B | 1.16517100  | 0.01928700  | 0.07551500  |
| B | -0.56548000 | 0.04160700  | 0.10050200  |
| N | -1.27042200 | -1.19954600 | 0.28785600  |
| N | -1.23924100 | 1.29974500  | -0.06366000 |
| O | 1.95817000  | -0.35873800 | -0.98811400 |
| O | 1.83409300  | 0.40320600  | 1.21306100  |
| C | -0.61335600 | -2.38478700 | 0.82081700  |
| H | -0.65023100 | -3.22180500 | 0.10410600  |
| H | -1.09900200 | -2.72513500 | 1.74934100  |
| H | 0.43256000  | -2.17593000 | 1.05796700  |
| C | -2.65807400 | -1.46870700 | -0.06367800 |
| H | -2.71948000 | -2.40669600 | -0.63724800 |
| H | -3.06401800 | -0.67270900 | -0.68990900 |
| H | -3.30745200 | -1.58734800 | 0.81990000  |
| C | -2.58687700 | 1.61993200  | 0.38942800  |
| H | -3.28470800 | 1.80001300  | -0.44520100 |
| H | -2.56380700 | 2.53751400  | 0.99713800  |
| H | -2.98918600 | 0.82330700  | 1.01618400  |
| C | -0.55467500 | 2.48132300  | -0.56976800 |
| H | -1.07493700 | 2.89685500  | -1.44761000 |
| H | 0.46689800  | 2.24015400  | -0.87384500 |
| H | -0.50654400 | 3.27488200  | 0.19326800  |
| C | 1.44205000  | -0.77882100 | -2.24327100 |
| H | 1.87624500  | -1.75302800 | -2.49391200 |
| H | 1.73593900  | -0.05635400 | -3.01365300 |
| H | 0.34930100  | -0.86513700 | -2.22703300 |
| C | 3.26072100  | 0.41075700  | 1.28358100  |

|   |             |             |             |
|---|-------------|-------------|-------------|
| H | 1.15958600  | -2.54084100 | 2.55007200  |
| H | 0.03030000  | -2.57141900 | 1.19726100  |
| H | -0.06574700 | -1.27871000 | 2.40431600  |
| C | 2.53543000  | -0.30581900 | 1.99240400  |
| H | 2.98370700  | -1.02121500 | 2.69756000  |
| H | 1.97849500  | 0.42688000  | 2.58807900  |
| H | 3.35811600  | 0.21758000  | 1.49566100  |
| C | 2.52392700  | -2.10251700 | 0.25163600  |
| H | 2.90163600  | -2.83381700 | 0.98125500  |
| H | 3.39116100  | -1.64924700 | -0.23023700 |
| H | 1.97558100  | -2.66692900 | -0.51084500 |

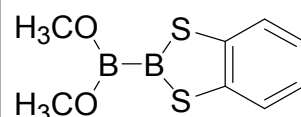

SCF energy=-1307.6050536

|   |             |             |             |
|---|-------------|-------------|-------------|
| B | 0.75575400  | -0.01101100 | 0.00006800  |
| B | 2.46599100  | -0.09252100 | 0.00004300  |
| S | -0.22927300 | -1.52537200 | 0.00006700  |
| S | -0.27875500 | 1.47349200  | 0.00007100  |
| C | -1.85068300 | 0.65356100  | 0.00002300  |
| C | -3.07426000 | 1.33756100  | -0.00003100 |
| C | -4.26418700 | 0.61287600  | -0.00007700 |
| C | -4.24024300 | -0.78997700 | -0.00008000 |
| C | -3.02726200 | -1.47516300 | -0.00001100 |
| C | -1.82416000 | -0.75413900 | 0.00003600  |
| H | -3.08970600 | 2.42407400  | -0.00003000 |
| H | -5.21430500 | 1.14013300  | -0.00012900 |
| H | -5.17228500 | -1.34863300 | -0.00013300 |
| H | -3.00770800 | -2.56157800 | -0.00000700 |
| O | 3.35842900  | 0.94759300  | 0.00005400  |
| O | 2.98636100  | -1.35787400 | -0.00004400 |
| C | 3.00178800  | 2.32558600  | -0.00008500 |
| H | 3.93093400  | 2.90146800  | -0.00122200 |
| H | 2.42402200  | 2.58489100  | 0.89452400  |
| H | 2.42218800  | 2.58430500  | -0.89367700 |
| C | 4.39587400  | -1.59350500 | -0.00011200 |
| H | 4.53975800  | -2.67673700 | -0.00613500 |
| H | 4.86262400  | -1.16457600 | 0.89330700  |
| H | 4.86467900  | -1.15416500 | -0.88733100 |

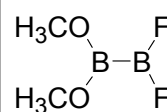

SCF energy=-479.8621293

|   |             |             |             |
|---|-------------|-------------|-------------|
| B | -0.34185400 | -0.06485200 | 0.00173800  |
| B | 1.32764000  | -0.50010200 | -0.02197300 |
| O | -0.84405600 | 1.19912600  | 0.11086600  |
| O | -1.21165300 | -1.10577600 | -0.11903000 |
| C | -0.07586900 | 2.39325500  | 0.24074200  |
| H | -0.49889900 | 2.98066400  | 1.06085700  |
| H | -0.15280600 | 2.96885500  | -0.68734700 |
| H | 0.97901500  | 2.18653400  | 0.44759400  |
| C | -2.62884900 | -0.90644700 | -0.15110900 |
| H | -3.08765600 | -1.89187200 | -0.25815100 |
| H | -2.91291400 | -0.27197800 | -0.99729400 |
| H | -2.97384600 | -0.43635700 | 0.77579000  |
| F | 2.27221500  | 0.26071300  | -0.59379600 |
| F | 1.77135700  | -1.63612600 | 0.51460100  |

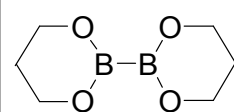

SCF energy=-586.6535429

|   |             |             |            |
|---|-------------|-------------|------------|
| B | -0.85909800 | -0.00000700 | 0.12199500 |
| B | 0.85909500  | -0.00003200 | 0.12199100 |
| O | 1.52909200  | 1.20087800  | 0.12121300 |
| O | 1.52912300  | -1.20092700 | 0.12092600 |
| C | 2.96052300  | 1.24664100  | 0.11087900 |

|   |            |             |            |
|---|------------|-------------|------------|
| H | 3.53177700 | 0.72081700  | 2.29654400 |
| H | 3.68633600 | 1.11548400  | 0.55993100 |
| H | 3.67265300 | -0.58467600 | 1.08235600 |

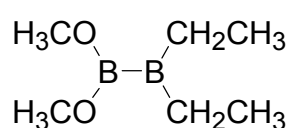

SCF energy=-438.5269983

|   |             |             |             |
|---|-------------|-------------|-------------|
| B | -0.83988400 | -0.08520700 | -0.13190200 |
| B | 0.86990000  | -0.23590000 | -0.02072100 |
| C | -1.71614200 | -1.38532100 | 0.11784700  |
| H | -1.36408800 | -2.11869500 | -0.63159100 |
| H | -1.40205300 | -1.84432600 | 1.07157600  |
| C | -1.54352600 | 1.26664600  | -0.56115900 |
| H | -2.37575000 | 1.46958100  | 0.13528600  |
| H | -2.06422300 | 1.04022300  | -1.51057700 |
| C | -3.25092700 | -1.29388800 | 0.06816100  |
| H | -3.64028500 | -0.61872200 | 0.84095800  |
| H | -3.60223800 | -0.91423700 | -0.89921300 |
| H | -3.72061200 | -2.27331800 | 0.22484000  |
| C | -0.68121100 | 2.52745700  | -0.73695500 |
| H | -0.19627600 | 2.81549400  | 0.20492000  |
| H | 0.11408400  | 2.36419100  | -1.47461300 |
| H | -1.27293300 | 3.38819600  | -1.07430600 |
| O | 1.65033000  | 0.01529700  | 1.08504300  |
| O | 1.51630800  | -0.65970700 | -1.15455100 |
| C | 1.11797100  | 0.44484100  | 2.32932900  |
| H | 1.70343100  | 1.29923600  | 2.68442600  |
| H | 0.06569200  | 0.74794700  | 2.24741200  |
| C | 2.93586700  | -0.82734500 | -1.19953400 |
| H | 3.18892700  | -1.15967200 | -2.20972400 |
| H | 3.26453200  | -1.57896200 | -0.47325300 |
| H | 3.44895200  | 0.11653600  | -0.98462900 |
| H | 1.19745800  | -0.36700400 | 3.06153700  |

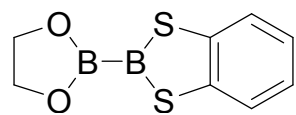

SCF energy=-1306.4030762

|   |             |             |             |
|---|-------------|-------------|-------------|
| C | 0.00000000  | 0.77398100  | 4.51707900  |
| C | 0.00000000  | -0.77398100 | 4.51707900  |
| H | -0.84259800 | 1.20418400  | 5.06614000  |
| H | 0.93126600  | 1.19766300  | 4.90853100  |
| H | -0.93126600 | -1.19766300 | 4.90853100  |
| H | 0.84259800  | -1.20418400 | 5.06614000  |
| B | 0.00000000  | 0.00000000  | 2.36498500  |
| B | 0.00000000  | 0.00000000  | 0.67214100  |
| O | 0.11607100  | -1.13976500 | 3.12678900  |
| O | -0.11607100 | 1.13976500  | 3.12678900  |
| S | 0.08343400  | -1.50025000 | -0.32458800 |
| S | -0.08343400 | 1.50025000  | -0.32458800 |
| C | -0.03881000 | 0.70326000  | -1.90744700 |
| C | 0.03881000  | -0.70326000 | -1.90744700 |
| C | 0.07696200  | -1.40447700 | -3.12117600 |
| C | 0.03828300  | -0.70048500 | -4.32269500 |
| C | -0.03828300 | 0.70048500  | -4.32269500 |
| C | -0.07696200 | 1.40447700  | -3.12117600 |
| H | 0.13618200  | -2.48946200 | -3.11907400 |
| H | 0.06784600  | -1.24274600 | -5.26387700 |
| H | -0.06784600 | 1.24274600  | -5.26387700 |
| H | -0.13618200 | 2.48946200  | -3.11907400 |

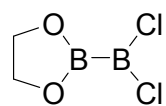

SCF energy=-1199.3712593

|   |             |             |             |
|---|-------------|-------------|-------------|
| B | -0.64413400 | -0.00023000 | -0.00038200 |
| B | 1.05604900  | -0.00010100 | -0.00021400 |
| C | -2.78840400 | 0.04489300  | 0.77233600  |

|   |             |             |             |
|---|-------------|-------------|-------------|
| H | 3.24708200  | 2.15705700  | -0.42592500 |
| C | 2.96052800  | -1.24666700 | 0.11059800  |
| C | 3.55145400  | 0.00006400  | -0.54325000 |
| O | -1.52911300 | -1.20091600 | 0.12115200  |
| O | -1.52909500 | 1.20090400  | 0.12099700  |
| C | -2.96054900 | -1.24660500 | 0.11093300  |
| C | -2.96052600 | 1.24668700  | 0.11055700  |
| H | -3.30988000 | 1.34383600  | 1.14807200  |
| C | -3.55143800 | -0.00005300 | -0.54327300 |
| H | 3.30979400  | 1.34351800  | 1.14844800  |
| H | -3.24702400 | 2.15696000  | -0.42650600 |
| H | -3.24718800 | -2.15705500 | -0.42575100 |
| H | -3.30977900 | -1.34333500 | 1.14853000  |
| H | 3.24712400  | -2.15695600 | -0.42639100 |
| H | 3.30984200  | -1.34374500 | 1.14814100  |
| H | -4.64486500 | -0.00002000 | -0.44518500 |
| H | -3.31471600 | -0.00022800 | -1.61558900 |
| H | 4.64487700  | 0.00004900  | -0.44514900 |
| H | 3.31473600  | 0.00019800  | -1.61556900 |

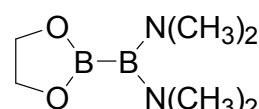

SCF energy=-548.0829406

|   |             |             |             |
|---|-------------|-------------|-------------|
| B | 1.03582300  | 0.00003200  | 0.00004300  |
| B | -0.68687200 | -0.00002100 | 0.00000200  |
| N | -1.39145400 | -1.24651200 | -0.14173700 |
| N | -1.39148600 | 1.24639300  | 0.14209400  |
| C | -0.78243500 | -2.54761000 | 0.10653100  |
| H | -0.71645300 | -3.14105700 | -0.82076100 |
| H | -1.38679400 | -3.12682400 | 0.82248400  |
| H | 0.21746300  | -2.43708500 | 0.52614300  |
| C | -2.73808700 | -1.38405800 | -0.68086700 |
| H | -2.73619600 | -2.12855400 | -1.49209500 |
| H | -3.09036600 | -0.44042400 | -1.09991900 |
| H | -3.46483900 | -1.72890200 | 0.07341600  |
| C | -2.73831800 | 1.38385400  | 0.68078800  |
| H | -3.46487400 | 1.72860300  | -0.07374000 |
| H | -2.73671400 | 2.12842400  | 1.49195900  |
| H | -3.09063800 | 0.44024400  | 1.09983900  |
| C | -0.78283500 | 2.54757300  | -0.10668100 |
| H | -1.38630000 | 3.12574100  | -0.82427200 |
| H | 0.21783100  | 2.43719200  | -0.52447300 |
| H | -0.71882300 | 3.14202700  | 0.82010100  |
| C | 3.20810600  | -0.46254700 | 0.61783100  |
| C | 3.20803500  | 0.46276800  | -0.61786600 |
| H | 3.58499900  | 0.03516500  | 1.51878900  |
| H | 3.77319900  | -1.38691400 | 0.46370800  |
| H | 3.77307800  | 1.38716900  | -0.46378200 |
| H | 3.58491400  | -0.03493400 | -1.51883900 |
| O | 1.82064700  | -0.79068100 | 0.82407400  |
| O | 1.82054600  | 0.79080900  | -0.82403700 |

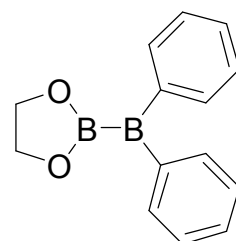

SCF energy=-742.1757615

|   |             |            |             |
|---|-------------|------------|-------------|
| B | 0.00018300  | 1.78208900 | -0.00017200 |
| B | -0.00002200 | 0.07158700 | 0.00003800  |
| C | -0.29615500 | 3.94303500 | 0.71238400  |
| C | 0.29705200  | 3.94321700 | -0.71193700 |
| H | -1.21782800 | 4.52613800 | 0.79646900  |
| H | 0.41685500  | 4.29486700 | 1.46673500  |
| H | -0.41584000 | 4.29556200 | -1.46616300 |
| H | 1.21892300  | 4.52603600 | -0.79581600 |

|    |             |             |             |
|----|-------------|-------------|-------------|
| C  | -2.78886400 | -0.04503200 | -0.77178300 |
| H  | -3.16780300 | -0.86416900 | 1.25046400  |
| H  | -3.34205100 | 0.90682800  | 1.15428900  |
| H  | -3.34284900 | -0.90687700 | -1.15343500 |
| H  | -3.16835500 | 0.86409400  | -1.24970500 |
| O  | -1.39515800 | 0.19535300  | 1.13003100  |
| O  | -1.39581800 | -0.19573400 | -1.13031200 |
| Cl | 1.96293700  | 1.51146500  | -0.07559500 |
| Cl | 1.96370400  | -1.51113200 | 0.07561200  |

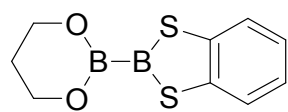

SCF energy=-1345.7256658

|   |             |             |             |
|---|-------------|-------------|-------------|
| B | 2.05807800  | -0.00050400 | -0.08954300 |
| O | 2.72145300  | 1.20181500  | -0.10507600 |
| O | 2.72226300  | -1.20236500 | -0.10410700 |
| S | -0.64289900 | 1.50189100  | -0.02743200 |
| S | -0.64358900 | -1.50264100 | -0.02761100 |
| B | 0.35778700  | -0.00062600 | -0.04886700 |
| C | 4.15551000  | 1.24863800  | -0.12968400 |
| H | 4.47579700  | 1.34721200  | -1.17576900 |
| H | 4.45248600  | 2.15808300  | 0.40180900  |
| C | 4.15634800  | -1.24797500 | -0.12944000 |
| H | 4.47624700  | -1.34619900 | -1.17568300 |
| H | 4.45434700  | -2.15719000 | 0.40185900  |
| C | 4.75998900  | 0.00058900  | 0.50898200  |
| H | 5.85030400  | 0.00095300  | 0.38348000  |
| H | 4.55074100  | 0.00058500  | 1.58680000  |
| C | -3.43966700 | 1.40637800  | 0.03114600  |
| C | -4.64157300 | 0.70199300  | 0.05580400  |
| C | -4.64188900 | -0.70095300 | 0.05570000  |
| C | -3.44029600 | -1.40587300 | 0.03094700  |
| C | -2.22638700 | -0.70442800 | 0.00585700  |
| C | -2.22606200 | 0.70440400  | 0.00595300  |
| H | -3.43728400 | 2.49304100  | 0.03109200  |
| H | -5.58239100 | 1.24549600  | 0.07522600  |
| H | -5.58295000 | -1.24403700 | 0.07505300  |
| H | -3.43839400 | -2.49253800 | 0.03074600  |

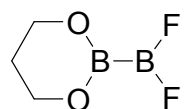

SCF energy=-517.9823974

|   |             |             |             |
|---|-------------|-------------|-------------|
| B | 0.22423000  | -0.00001000 | 0.07112100  |
| O | -0.42664500 | 1.20212500  | 0.10549600  |
| O | -0.42662900 | -1.20217300 | 0.10498700  |
| B | 1.94035500  | 0.00001100  | -0.02346800 |
| C | -1.86189700 | 1.24992500  | 0.16820900  |
| H | -2.15100100 | 1.35217700  | 1.22241300  |
| H | -2.17052400 | 2.15817600  | -0.35774200 |
| C | -1.86186700 | -1.25003300 | 0.16760000  |
| H | -2.15102100 | -1.35282600 | 1.22174000  |
| H | -2.17047500 | -2.15802300 | -0.35881800 |
| C | -2.48316700 | 0.00009200  | -0.45132300 |
| H | -3.56907000 | 0.00003400  | -0.29348900 |
| H | -2.30721900 | 0.00035900  | -1.53503700 |
| F | 2.65362800  | -1.12782000 | -0.06213900 |
| F | 2.65350200  | 1.12788500  | -0.06320700 |

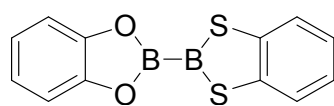

SCF energy=-1458.8344917

|   |             |             |             |
|---|-------------|-------------|-------------|
| B | 1.22217300  | 0.00058600  | 0.00001500  |
| B | -0.45935600 | 0.00067100  | 0.00020400  |
| O | 2.01967000  | -1.14429600 | 0.00006500  |
| O | 2.02022000  | 1.14502400  | -0.00024600 |
| S | -1.45420800 | 1.50392800  | 0.00046300  |

|   |             |             |             |
|---|-------------|-------------|-------------|
| O | -0.59429200 | 2.55631500  | 0.97847500  |
| O | 0.59474100  | 2.55649900  | -0.97856800 |
| C | 1.36288400  | -0.69521000 | 0.06403600  |
| C | 2.54498900  | -0.12337600 | -0.46368900 |
| C | 1.48237400  | -1.96385900 | 0.67851000  |
| C | 3.76706900  | -0.79574700 | -0.41595500 |
| H | 2.49575300  | 0.85684900  | -0.93104700 |
| C | 2.70856100  | -2.62557900 | 0.76162400  |
| H | 0.60188700  | -2.42771100 | 1.11554600  |
| C | 3.85293400  | -2.04705700 | 0.20323500  |
| H | 4.65525800  | -0.34027100 | -0.84777700 |
| H | 2.77243800  | -3.59257500 | 1.25518200  |
| H | 4.80768200  | -2.56521700 | 0.25670100  |
| C | -1.36308500 | -0.69495200 | -0.06380500 |
| C | -1.48251400 | -1.96386900 | -0.67776700 |
| C | -2.54535100 | -0.12272500 | 0.46312200  |
| C | -2.70876300 | -2.62545000 | -0.76114500 |
| H | -0.60194100 | -2.42807400 | -1.11424300 |
| C | -3.76751200 | -0.79491800 | 0.41510600  |
| H | -2.49617600 | 0.85768500  | 0.93009900  |
| C | -3.85330300 | -2.04649700 | -0.20355900 |
| H | -2.77255800 | -3.59265100 | -1.25431100 |
| H | -4.65582100 | -0.33911200 | 0.84633300  |
| H | -4.80811600 | -2.56451200 | -0.25725000 |

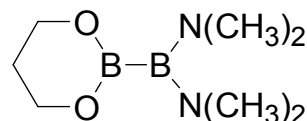

SCF energy=-587.4021763

|   |             |             |             |
|---|-------------|-------------|-------------|
| B | -0.74560600 | 0.08047000  | 0.04725300  |
| O | -1.41504300 | 0.74299200  | -0.96378800 |
| O | -1.44326100 | -0.51139700 | 1.08244000  |
| B | 0.97884100  | -0.00692000 | 0.01055900  |
| C | -2.84444300 | 0.83658900  | -0.97935900 |
| H | -3.13414900 | 1.78748900  | -0.50969200 |
| H | -3.15169200 | 0.87455000  | -2.02981700 |
| C | -2.87426000 | -0.46604600 | 1.14341700  |
| H | -3.16734400 | 0.38567300  | 1.77347400  |
| H | -3.20240500 | -1.38241600 | 1.64541900  |
| C | -3.48652900 | -0.33986900 | -0.24901800 |
| H | -4.57277500 | -0.19777100 | -0.17692400 |
| H | -3.31124400 | -1.26484300 | -0.81446500 |
| N | 1.61066800  | -1.29163600 | -0.12193000 |
| N | 1.73434200  | 1.21284300  | 0.11076900  |
| C | 0.88960800  | -2.46747600 | -0.58435800 |
| H | 0.85980100  | -3.25134600 | 0.18996500  |
| H | 1.36722600  | -2.90131400 | -1.47787900 |
| H | -0.13828800 | -2.21194600 | -0.85111400 |
| C | 2.96912000  | -1.62320300 | 0.28425900  |
| H | 2.95539000  | -2.51945900 | 0.92398700  |
| H | 3.62891900  | -1.84525200 | -0.57142100 |
| H | 3.41175100  | -0.81236500 | 0.86460200  |
| C | 3.09404600  | 1.41990800  | -0.36670300 |
| H | 3.81463200  | 1.58214500  | 0.45266000  |
| H | 3.43054300  | 0.57171200  | -0.96448700 |
| H | 3.12846000  | 2.31313900  | -1.01002900 |
| C | 1.14987500  | 2.44820700  | 0.60990900  |
| H | 1.15034900  | 3.23476100  | -0.16219200 |
| H | 1.71276500  | 2.83243800  | 1.47597200  |
| H | 0.11874100  | 2.28719400  | 0.93290800  |

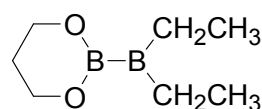

SCF energy=-476.6471516

|   |             |             |             |
|---|-------------|-------------|-------------|
| B | -0.40372800 | -0.04201300 | -0.00008600 |
| O | -1.07788700 | -0.04044900 | -1.20338500 |
| O | -1.07787500 | -0.03917000 | 1.20320500  |

|   |             |             |             |
|---|-------------|-------------|-------------|
| S | -1.45343700 | -1.50315400 | 0.00016700  |
| C | 5.69584000  | 0.70094800  | -0.00031200 |
| C | 4.49919700  | 1.43393500  | -0.00024100 |
| C | 3.32517900  | 0.69776100  | -0.00019000 |
| C | 3.32480000  | -0.69768600 | 0.00007300  |
| C | 4.49851300  | -1.43437300 | 0.00029100  |
| C | 5.69549300  | -0.70194100 | -0.00008600 |
| H | 6.64254200  | 1.23378000  | -0.00051100 |
| H | 4.48748700  | 2.51918500  | -0.00044600 |
| H | 4.48632600  | -2.51962000 | 0.00043700  |
| H | 6.64194000  | -1.23522800 | -0.00010400 |
| C | -3.03601000 | 0.70421700  | 0.00017100  |
| C | -4.24961400 | 1.40660900  | 0.00001300  |
| C | -5.45058800 | 0.70092000  | -0.00030800 |
| C | -5.45023000 | -0.70219300 | -0.00047900 |
| C | -4.24890200 | -1.40727500 | -0.00025700 |
| C | -3.03563300 | -0.70428500 | 0.00005300  |
| H | -4.24776300 | 2.49312600  | 0.00011700  |
| H | -6.39190500 | 1.24359900  | -0.00045900 |
| H | -6.39126900 | -1.24535300 | -0.00075600 |
| H | -4.24651700 | -2.49379300 | -0.00036700 |

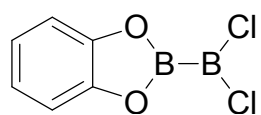

SCF energy=-1351.8016363

|    |             |             |             |
|----|-------------|-------------|-------------|
| B  | 0.51252600  | -0.00009700 | 0.00016500  |
| B  | 2.20723700  | 0.00004600  | 0.00002800  |
| O  | -0.27778600 | -1.14364200 | 0.00015800  |
| O  | -0.27771400 | 1.14353400  | 0.00010400  |
| C  | -3.95201600 | 0.70205500  | -0.00011700 |
| C  | -2.75690300 | 1.43559300  | 0.00001900  |
| C  | -1.58330800 | 0.69776600  | 0.00009900  |
| C  | -1.58336000 | -0.69777600 | -0.00000800 |
| C  | -2.75698300 | -1.43554700 | -0.00006200 |
| C  | -3.95205700 | -0.70194300 | -0.00007400 |
| H  | -4.89902200 | 1.23416300  | -0.00017800 |
| H  | -2.74477000 | 2.52071900  | -0.00001400 |
| H  | -2.74489900 | -2.52067300 | -0.00006200 |
| H  | -4.89909500 | -1.23399400 | -0.00006300 |
| Cl | 3.10705000  | -1.51335100 | -0.00004700 |
| Cl | 3.10711000  | 1.51335300  | -0.00006400 |

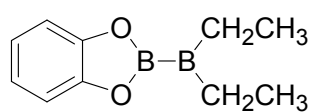

SCF energy=-589.7575639

|   |             |             |             |
|---|-------------|-------------|-------------|
| B | 0.47425200  | -0.08276500 | 0.00789500  |
| B | 2.18033200  | -0.08398900 | 0.00976200  |
| O | -0.32804700 | -0.22934000 | -1.12944500 |
| O | -0.33055900 | 0.04358400  | 1.14602200  |
| C | -4.00907100 | -0.05550700 | 0.70567300  |
| C | -2.81139500 | 0.04569100  | 1.43193100  |
| C | -1.63684000 | -0.02584600 | 0.70101000  |
| C | -1.63533100 | -0.19039000 | -0.68365600 |
| C | -2.80828400 | -0.29158700 | -1.41363900 |
| C | -4.00756000 | -0.22041500 | -0.68645900 |
| H | -4.95575600 | -0.00445200 | 1.23628500  |
| H | -2.80086700 | 0.17347400  | 2.50979700  |
| H | -2.79537200 | -0.41945200 | -2.49146800 |
| H | -4.95308500 | -0.29529500 | -1.21630600 |
| C | 2.90751600  | -1.48844200 | 0.09153600  |
| H | 2.51858200  | -2.09871800 | -0.74393100 |
| H | 2.50643500  | -2.01027800 | 0.97926300  |
| C | 4.44415300  | -1.54679200 | 0.10590800  |
| H | 4.86097700  | -0.99619700 | 0.95835300  |
| H | 4.87332500  | -1.10967300 | -0.80410000 |
| H | 4.80722200  | -2.57978500 | 0.17457300  |

|   |             |             |             |
|---|-------------|-------------|-------------|
| B | 1.30948200  | -0.07016800 | -0.00004700 |
| C | -2.51211800 | -0.03921900 | -1.24719300 |
| H | -2.85311900 | 1.00109500  | -1.34117500 |
| H | -2.80419200 | -0.57335600 | -2.15714700 |
| C | -2.51208600 | -0.03863700 | 1.24730200  |
| H | -2.85353800 | 1.00153800  | 1.34114000  |
| H | -2.80372300 | -0.57270600 | 2.15744300  |
| C | -3.10375800 | -0.69093800 | 0.00020800  |
| H | -4.19689400 | -0.59004400 | 0.00021600  |
| H | -2.87029400 | -1.76395700 | 0.00041400  |
| C | 2.02666200  | -1.48605200 | 0.00006500  |
| H | 1.62614500  | -2.04698300 | 0.86383700  |
| H | 1.62650900  | -2.04674200 | -0.86404300 |
| C | 2.17414700  | 1.25607700  | -0.00011600 |
| H | 2.85933800  | 1.19899400  | -0.86506000 |
| H | 2.85903200  | 1.19921000  | 0.86508400  |
| C | 1.44417500  | 2.60931600  | -0.00039600 |
| H | 0.80208100  | 2.71309100  | 0.88347000  |
| H | 2.14298600  | 3.45603500  | -0.00036700 |
| H | 0.80240700  | 2.71289500  | -0.88452100 |
| C | 3.56298000  | -1.56605600 | 0.00037200  |
| H | 3.99262500  | -1.07627900 | 0.88330800  |
| H | 3.99298500  | -1.07617000 | -0.88232900 |
| H | 3.91496200  | -2.60570400 | 0.00037900  |

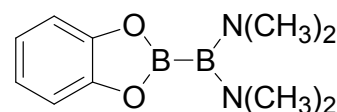

SCF energy=-700.5151074

|   |             |             |             |
|---|-------------|-------------|-------------|
| B | 0.05603100  | -0.00008500 | 0.00005800  |
| B | 1.77204300  | -0.00002800 | 0.00006500  |
| O | -0.75755100 | 0.86415400  | 0.74866500  |
| O | -0.75755800 | -0.86432300 | -0.74855700 |
| C | -4.43481400 | -0.52826700 | -0.46098800 |
| C | -3.23635300 | -1.07986800 | -0.94158400 |
| C | -2.06147400 | -0.52626700 | -0.45792800 |
| C | -2.06147300 | 0.52613300  | 0.45800800  |
| C | -3.23634300 | 1.07980000  | 0.94160600  |
| C | -4.43481100 | 0.52825800  | 0.46095700  |
| H | -5.38119100 | -0.93057800 | -0.81176600 |
| H | -3.22469900 | -1.89823600 | -1.65472000 |
| H | -3.22467700 | 1.89817200  | 1.65473800  |
| H | -5.38118400 | 0.93062800  | 0.81167500  |
| N | 2.45553400  | 1.24296500  | -0.21524100 |
| N | 2.45586500  | -1.24285700 | 0.21540200  |
| C | 3.82026000  | 1.54346500  | 0.19764500  |
| H | 3.83619400  | 2.49756400  | 0.74589700  |
| H | 4.20403200  | 0.77233000  | 0.86689500  |
| H | 4.51024700  | 1.64688800  | -0.65595800 |
| C | 1.81505500  | 2.39934000  | -0.82763600 |
| H | 1.82520800  | 3.26637500  | -0.14895700 |
| H | 0.77646200  | 2.18115000  | -1.08484100 |
| H | 2.33401400  | 2.69375300  | -1.75352000 |
| C | 1.81553200  | -2.39952200 | 0.82739700  |
| H | 2.33441000  | -2.69414600 | 1.75325900  |
| H | 1.82593500  | -3.26637600 | 0.14847500  |
| H | 0.77685500  | -2.18161600 | 1.08449700  |
| C | 3.82065200  | -1.54300500 | -0.19766600 |
| H | 4.51081200  | -1.64628100 | 0.65580400  |
| H | 4.20414800  | -0.77178900 | -0.86698400 |
| H | 3.83674800  | -2.49708100 | -0.74596100 |

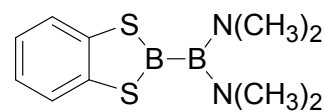

SCF energy=-1346.4746702

|   |            |             |            |
|---|------------|-------------|------------|
| B | 0.35522100 | -0.00010400 | 0.00008500 |
| B | 2.07412700 | 0.00001600  | 0.00002400 |



|   |            |            |             |
|---|------------|------------|-------------|
| C | 3.01385100 | 1.25640300 | -0.04518100 |
| H | 3.60496900 | 1.27929000 | 0.88979900  |
| H | 3.78774800 | 1.14839600 | -0.82448100 |
| C | 2.26612600 | 2.58820700 | -0.22124500 |
| H | 2.95065600 | 3.44578100 | -0.22328900 |
| H | 1.54128900 | 2.74849700 | 0.58667100  |
| H | 1.71080700 | 2.61030100 | -1.16733000 |

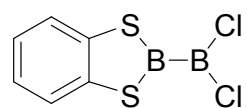

SCF energy=-1997.763129

|    |             |             |             |
|----|-------------|-------------|-------------|
| B  | -0.77761600 | 0.00006400  | 0.00012700  |
| B  | -2.46762800 | -0.00000400 | 0.00001300  |
| C  | 4.20915800  | 0.70187100  | 0.00002400  |
| C  | 3.00930400  | 1.40786000  | 0.00021400  |
| C  | 1.79534900  | 0.70482100  | 0.00016000  |
| C  | 1.79531600  | -0.70481100 | -0.00010000 |
| C  | 3.00922600  | -1.40792100 | -0.00031000 |
| C  | 4.20912000  | -0.70200000 | -0.00023900 |
| H  | 5.15065500  | 1.24406600  | 0.00006500  |
| H  | 3.00754700  | 2.49427900  | 0.00041500  |
| H  | 3.00740600  | -2.49434000 | -0.00051500 |
| H  | 5.15058600  | -1.24424800 | -0.00040100 |
| Cl | -3.38754600 | -1.51020300 | 0.00036900  |
| Cl | -3.38763100 | 1.51014900  | -0.00051500 |
| S  | 0.21629200  | -1.50320500 | -0.00015700 |
| S  | 0.21640800  | 1.50332700  | 0.00039000  |

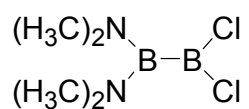

SCF energy=-1239.4459239

|    |             |             |             |
|----|-------------|-------------|-------------|
| B  | -1.16251400 | -0.00008700 | 0.00002500  |
| B  | 0.55584300  | 0.00000900  | 0.00007900  |
| N  | 1.22361800  | 1.26022800  | -0.12247700 |
| N  | 1.22385800  | -1.26011600 | 0.12249200  |
| C  | 2.59504100  | 1.54404800  | 0.28246500  |
| H  | 2.61355100  | 2.44894400  | 0.90792100  |
| H  | 3.00422500  | 0.72585000  | 0.87635800  |
| H  | 3.26051700  | 1.72581200  | -0.57693500 |
| C  | 0.54217800  | 2.45970900  | -0.59227000 |
| H  | 0.53117000  | 3.24235600  | 0.18200800  |
| H  | -0.49191700 | 2.24135400  | -0.87277300 |
| H  | 1.03974800  | 2.87509400  | -1.48221400 |
| C  | 0.54277800  | -2.45956100 | 0.59276400  |
| H  | 1.03959200  | -2.87372500 | 1.48372000  |
| H  | 0.53323100  | -3.24302900 | -0.18070600 |
| H  | -0.49181000 | -2.24166600 | 0.87179500  |
| C  | 2.59525800  | -1.54368400 | -0.28259300 |
| H  | 3.26043300  | -1.72667400 | 0.57677100  |
| H  | 3.00467200  | -0.72471600 | -0.87524400 |
| H  | 2.61367300  | -2.44777600 | -0.90921000 |
| Cl | -2.10811500 | 0.44837700  | 1.43900800  |
| Cl | -2.10762500 | -0.44868900 | -1.43926200 |

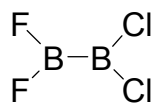

SCF energy=-1170.016851

|    |             |             |             |
|----|-------------|-------------|-------------|
| B  | 0.00000000  | 0.00000000  | -0.34951200 |
| B  | 0.00000000  | 0.00000000  | 1.35659600  |
| F  | -1.13304700 | -0.00094100 | 2.05398800  |
| F  | 1.13304700  | 0.00094100  | 2.05398800  |
| Cl | 0.00000000  | -1.51743000 | -1.23550600 |
| Cl | 0.00000000  | 1.51743000  | -1.23550600 |

|   |             |             |             |
|---|-------------|-------------|-------------|
| C | -4.66929400 | -0.34640600 | -0.60958300 |
| C | -3.46635800 | -0.69528000 | -1.22182800 |
| C | -2.25337000 | -0.34952000 | -0.61088600 |
| C | -2.25337200 | 0.34928100  | 0.61099900  |
| C | -3.46636300 | 0.69536800  | 1.22175100  |
| C | -4.66929800 | 0.34663500  | 0.60942100  |
| H | -5.61019400 | -0.61523800 | -1.08218400 |
| H | -3.46448000 | -1.23362500 | -2.16579700 |
| H | -3.46448800 | 1.23381800  | 2.16566100  |
| H | -5.61020000 | 0.61571900  | 1.08187500  |
| N | 2.75880500  | 1.20966200  | -0.35790900 |
| N | 2.75915200  | -1.20940800 | 0.35796400  |
| C | 4.12350000  | 1.55660300  | 0.01785400  |
| H | 4.13860500  | 2.56609100  | 0.45582600  |
| H | 4.50949300  | 0.86647900  | 0.76924800  |
| H | 4.81255600  | 1.56464800  | -0.84266100 |
| C | 2.10865200  | 2.29635100  | -1.07903900 |
| H | 2.09933400  | 3.22218600  | -0.48247800 |
| H | 1.07711200  | 2.03710200  | -1.32722200 |
| H | 2.63438300  | 2.51286400  | -2.02236600 |
| C | 2.10925900  | -2.29635000 | 1.07889200  |
| H | 2.63534600  | -2.51325400 | 2.02192700  |
| H | 2.09970600  | -3.22200000 | 0.48200800  |
| H | 1.07781500  | -2.03719800 | 1.32756400  |
| C | 4.12386100  | -1.55606000 | -0.01807900 |
| H | 4.81299000  | -1.56430700 | 0.84236700  |
| H | 4.50968600  | -0.86568800 | -0.76930600 |
| H | 4.13903900  | -2.56543300 | -0.45635100 |
| S | -0.66538100 | -0.75017800 | -1.29721800 |
| S | -0.66539700 | 0.74972500  | 1.29746500  |

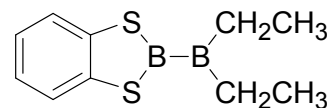

SCF energy=-1235.7183898

|   |             |             |             |
|---|-------------|-------------|-------------|
| B | 0.75458400  | 0.03946300  | 0.07102600  |
| B | 2.45385700  | 0.04137400  | 0.07580100  |
| C | -4.26056900 | 0.66227600  | -0.26724000 |
| C | -3.05668100 | 1.27068500  | -0.61997000 |
| C | -1.84578600 | 0.65744900  | -0.27264500 |
| C | -1.84790500 | -0.56255800 | 0.42680400  |
| C | -3.06093800 | -1.16887900 | 0.77877000  |
| C | -4.26268700 | -0.55405100 | 0.42989000  |
| H | -5.20049400 | 1.13645300  | -0.53635700 |
| H | -3.05317900 | 2.21319900  | -1.16065800 |
| H | -3.06074700 | -2.11146600 | 1.31934200  |
| H | -5.20425900 | -1.02345100 | 0.70161900  |
| C | 3.18709100  | 0.78449800  | 1.27001300  |
| H | 2.80315100  | 0.34263000  | 2.20713400  |
| H | 2.78862500  | 1.81398200  | 1.30848900  |
| C | 4.72432800  | 0.82051700  | 1.30541600  |
| H | 5.13696000  | 1.32469000  | 0.42275100  |
| H | 5.15234900  | -0.18928100 | 1.33139000  |
| H | 5.09360700  | 1.35528600  | 2.18933100  |
| C | 3.29821200  | -0.68109000 | -1.04928900 |
| H | 4.04055500  | 0.04514600  | -1.42466200 |
| H | 3.92620100  | -1.42586800 | -0.52564200 |
| C | 2.57257900  | -1.34801900 | -2.22860900 |
| H | 3.27678000  | -1.82175500 | -2.92418300 |
| H | 1.98607200  | -0.61814900 | -2.79995300 |
| H | 1.87707700  | -2.12295900 | -1.88422400 |
| S | -0.25680900 | 1.34606400  | -0.67159100 |
| S | -0.26136400 | -1.25903900 | 0.82175700  |

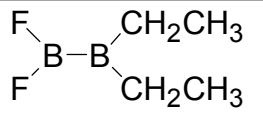

SCF energy=-407.9764397

|   |            |            |            |
|---|------------|------------|------------|
| B | 0.0000000  | 0.0000000  | -0.5774300 |
| B | 0.0000000  | 0.0000000  | 1.1305150  |
| F | 1.1251360  | 0.1038020  | 1.8521690  |
| F | -1.1251360 | -0.1038020 | 1.8521690  |
| C | -0.2845800 | 1.3289930  | -1.3792960 |
| H | -1.3717510 | 1.2517600  | -1.5869600 |
| H | 0.1799040  | 1.2890670  | -2.3768840 |
| C | 0.0000000  | 2.6828960  | -0.7049360 |
| H | -0.3064750 | 3.5245420  | -1.3378240 |
| H | -0.5353340 | 2.7789900  | 0.2484520  |
| H | 1.0693950  | 2.8053380  | -0.4936270 |
| C | 0.2845800  | -1.3289930 | -1.3792960 |
| H | -0.1799040 | -1.2890670 | -2.3768840 |
| H | 1.3717510  | -1.2517600 | -1.5869600 |
| C | 0.0000000  | -2.6828960 | -0.7049360 |
| H | 0.5353340  | -2.7789900 | 0.2484520  |
| H | -1.0693950 | -2.8053380 | -0.4936270 |
| H | 0.3064750  | -3.5245420 | -1.3378240 |

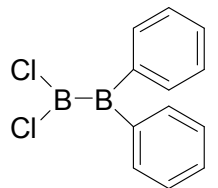

SCF energy=-1433.538708

|    |            |            |            |
|----|------------|------------|------------|
| B  | 0.0000170  | 0.1786240  | -0.0001070 |
| B  | -0.0000200 | 1.8747980  | -0.0001060 |
| C  | -1.3672980 | -0.5797280 | -0.0397550 |
| C  | -2.5471520 | -0.0128430 | 0.4968640  |
| C  | -1.4885550 | -1.8433770 | -0.6639860 |
| C  | -3.7703200 | -0.6812620 | 0.4452000  |
| H  | -2.5031960 | 0.9605420  | 0.9796990  |
| C  | -2.7154300 | -2.5035480 | -0.7472140 |
| H  | -0.6105390 | -2.3034990 | -1.1090620 |
| C  | -3.8579020 | -1.9280860 | -0.1826960 |
| H  | -4.6563460 | -0.2273710 | 0.8821510  |
| H  | -2.7807820 | -3.4669650 | -1.2470240 |
| H  | -4.8130450 | -2.4448650 | -0.2375700 |
| C  | 1.3673390  | -0.5796880 | 0.0396270  |
| C  | 2.5471900  | -0.0127860 | -0.4969880 |
| C  | 1.4886220  | -1.8433310 | 0.6638760  |
| C  | 3.7703750  | -0.6811650 | -0.4452980 |
| H  | 2.5032060  | 0.9605970  | -0.9798280 |
| C  | 2.7155110  | -2.5034660 | 0.7471230  |
| H  | 0.6106130  | -2.3034630 | 1.1089580  |
| C  | 3.8579790  | -1.9279820 | 0.1826140  |
| H  | 4.6563960  | -0.2272470 | -0.8822320 |
| H  | 2.7808810  | -3.4668830 | 1.2469320  |
| H  | 4.8131330  | -2.4447340 | 0.2375180  |
| Cl | 0.1453030  | 2.8019910  | 1.5059990  |
| Cl | 0.1451580  | 2.8027350  | -1.5056860 |

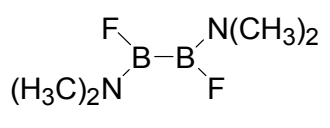

SCF energy=-518.7521252

|   |            |            |            |
|---|------------|------------|------------|
| B | 0.7485010  | -0.4264100 | 0.1825440  |
| B | -0.7484920 | 0.4264670  | 0.1826400  |
| N | 2.0148130  | 0.1186940  | -0.0882560 |
| N | -2.0146890 | -0.1188000 | -0.0882730 |
| C | 2.2554670  | 1.5122890  | -0.4474690 |
| H | 2.9404090  | 1.9812230  | 0.2734340  |
| H | 2.7193150  | 1.5772810  | -1.4423620 |
| H | 1.3238010  | 2.0768330  | -0.4529060 |
| C | 3.2405490  | -0.6759590 | -0.0475280 |

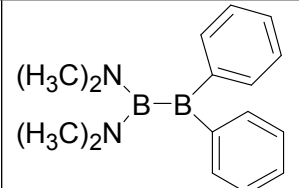

SCF energy=-782.2431752

|   |            |            |            |
|---|------------|------------|------------|
| B | 0.0000900  | -0.1542550 | 0.0002470  |
| B | -0.0001970 | 1.5791400  | 0.0000800  |
| N | 0.4119900  | 2.2690920  | 1.1938390  |
| N | -0.4125890 | 2.2684150  | -1.1941300 |
| C | 0.8867710  | 3.6433490  | 1.2876980  |
| H | 1.8354590  | 3.6684830  | 1.8457320  |
| H | 1.0782960  | 4.0606730  | 0.2983090  |
| H | 0.1810130  | 4.3044190  | 1.8181450  |
| C | 0.5176820  | 1.5801520  | 2.4725290  |
| H | 1.5504610  | 1.6001710  | 2.8560110  |
| H | 0.2114650  | 0.5347500  | 2.3795790  |
| H | -0.1283570 | 2.0471760  | 3.2335300  |
| C | -0.5183240 | 1.5788760  | -2.4724900 |
| H | 0.1267390  | 2.0463450  | -3.2340450 |
| H | -1.5513570 | 1.5975940  | -2.8553650 |
| H | -0.2108460 | 0.5338600  | -2.3793840 |
| C | -0.8879090 | 3.6424640  | -1.2885370 |
| H | -0.1821190 | 4.3037670  | -1.8186620 |
| H | -1.0802650 | 4.0598280  | -0.2993220 |
| H | -1.8362580 | 3.6670410  | -1.8471640 |
| C | 1.3634790  | -0.9357380 | -0.0761590 |
| C | 2.4932900  | -0.3414040 | -0.6843690 |
| C | 1.5494080  | -2.2184720 | 0.4895930  |
| C | 3.7218370  | -0.9984930 | -0.7636920 |
| H | 2.4004020  | 0.6568410  | -1.1073920 |
| C | 2.7839360  | -2.8702110 | 0.4471900  |
| H | 0.7156880  | -2.7043620 | 0.9900280  |
| C | 3.8713150  | -2.2662780 | -0.1917110 |
| H | 4.5658100  | -0.5191890 | -1.2545600 |
| H | 2.8977710  | -3.8497230 | 0.9062180  |
| H | 4.8310470  | -2.7760470 | -0.2359510 |
| C | -1.3631100 | -0.9361090 | 0.0765200  |
| C | -2.4930660 | -0.3421670 | 0.6848430  |
| C | -1.5487560 | -2.2187660 | -0.4895070 |
| C | -3.7214680 | -0.9995490 | 0.7640250  |
| H | -2.4004240 | 0.6560150  | 1.1080660  |
| C | -2.7831390 | -2.8707870 | -0.4472560 |
| H | -0.7149340 | -2.7043600 | -0.9900600 |
| C | -3.8706610 | -2.2672410 | 0.1917670  |
| H | -4.5655470 | -0.5205350 | 1.2549930  |
| H | -2.8967500 | -3.8502240 | -0.9065010 |
| H | -4.8302760 | -2.7772410 | 0.2358890  |

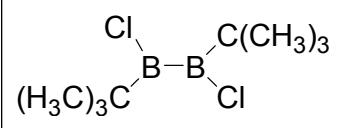

SCF energy=-1285.9622398

|   |            |            |            |
|---|------------|------------|------------|
| B | -0.2026760 | 0.8221240  | -0.2645810 |
| B | 0.2026760  | -0.8221240 | -0.2645810 |
| C | 0.5106880  | 1.9940800  | 0.5354760  |
| C | -0.5106880 | -1.9940800 | 0.5354760  |
| C | 1.4889560  | 1.4331270  | 1.5932660  |
| H | 2.2573690  | 0.7940540  | 1.1406180  |
| H | 2.0080030  | 2.2515490  | 2.1108850  |
| H | 0.9664410  | 0.8443940  | 2.3581730  |
| C | 1.3209770  | 2.8228060  | -0.5023050 |
| H | 1.8618980  | 3.6271400  | 0.0159710  |
| H | 2.0640140  | 2.2103440  | -1.0276570 |
| H | 0.6679950  | 3.2835500  | -1.2513590 |
| C | -0.5106880 | 2.9238190  | 1.2329500  |
| H | -1.2046840 | 3.3765820  | 0.5174280  |
| H | -1.1041070 | 2.3854650  | 1.9830550  |

|   |             |             |             |
|---|-------------|-------------|-------------|
| H | 3.73959800  | -0.66344500 | -1.02698500 |
| H | 3.94070800  | -0.26298700 | 0.69254400  |
| H | 3.01554700  | -1.70897600 | 0.21970500  |
| C | 3.24038400  | 0.67600900  | -0.04755700 |
| H | -3.73918000 | 0.66393000  | -1.02715000 |
| H | -3.94077400 | 0.26280800  | 0.69217000  |
| H | -3.01536300 | 1.70889500  | 0.22015100  |
| C | -2.25560500 | -1.51233200 | -0.44743200 |
| H | -2.94037900 | -1.98117900 | 0.27368500  |
| H | -2.71978900 | -1.57724900 | -1.44217600 |
| H | -1.32402100 | -2.07700400 | -0.45321900 |
| F | 0.72826300  | -1.76902600 | 0.49015500  |
| F | -0.72836700 | 1.76905800  | 0.49015800  |

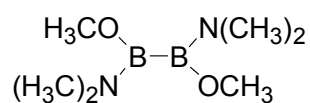

SCF energy=-549.2942233

|   |             |             |             |
|---|-------------|-------------|-------------|
| B | 0.83398500  | -0.15278800 | -0.24907100 |
| B | -0.82856900 | -0.15575600 | 0.23995800  |
| N | -1.78993900 | 0.72632100  | -0.32566300 |
| N | 1.80849800  | 0.68527200  | 0.35689400  |
| C | -3.19727800 | 0.72737900  | 0.05446900  |
| H | -3.83924300 | 0.53729500  | -0.81949500 |
| H | -3.48935500 | 1.70210300  | 0.47519200  |
| H | -3.38087900 | -0.04653800 | 0.80067200  |
| C | -1.47115600 | 1.72864300  | -1.32869500 |
| H | -2.05092700 | 1.56632700  | -2.25102200 |
| H | -0.40834100 | 1.69577300  | -1.58236200 |
| H | -1.70581100 | 2.74210200  | -0.96644600 |
| C | 1.50777500  | 1.63340900  | 1.41666100  |
| H | 2.08799900  | 1.41016600  | 2.32574000  |
| H | 0.44529600  | 1.60113000  | 1.67156400  |
| H | 1.75622800  | 2.66205200  | 1.11116000  |
| C | 3.21336200  | 0.69004100  | -0.03271800 |
| H | 3.85820500  | 0.44197200  | 0.82433700  |
| H | 3.51506600  | 1.68357100  | -0.39887100 |
| H | 3.38166200  | -0.04195700 | -0.82351900 |
| O | -1.31991700 | -1.03460300 | 1.19867800  |
| O | 1.31027500  | -0.98557300 | -1.25836500 |
| C | 0.46963900  | -1.90833900 | -1.93247700 |
| H | 1.00350300  | -2.25596100 | -2.82251600 |
| H | -0.47660200 | -1.44745700 | -2.24386200 |
| H | 0.24660900  | -2.77627900 | -1.29741900 |
| C | -0.52852700 | -2.00915500 | 1.85401900  |
| H | -0.80938200 | -3.01049400 | 1.50292100  |
| H | -0.72164100 | -1.95307400 | 2.93157500  |
| H | 0.54485800  | -1.85962000 | 1.67922600  |

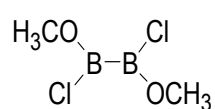

SCF energy=-1200.5823951

|    |             |             |             |
|----|-------------|-------------|-------------|
| B  | 0.85165500  | -0.02361200 | 0.11237600  |
| B  | -0.85164800 | 0.02355700  | 0.11236500  |
| O  | -1.55921500 | -0.79761400 | 0.90440700  |
| O  | 1.55915000  | 0.79786100  | 0.90418700  |
| C  | 2.99064400  | 0.86264100  | 0.98121400  |
| H  | 3.23043200  | 1.62779300  | 1.72159000  |
| H  | 3.41182400  | 1.13799400  | 0.01002000  |
| H  | 3.39988500  | -0.10197400 | 1.29493400  |
| C  | -2.99071300 | -0.86223800 | 0.98144400  |
| H  | -3.23066000 | -1.62746000 | 1.72170000  |
| H  | -3.41188800 | -1.13734800 | 0.01018300  |
| H  | -3.39974900 | 0.10241000  | 1.29531600  |
| Cl | 1.69648900  | -1.18318300 | -0.98281100 |
| Cl | -1.69642700 | 1.18285700  | -0.98319800 |

|    |             |             |             |
|----|-------------|-------------|-------------|
| H  | 0.01707100  | 3.73594800  | 1.75199800  |
| C  | 0.51068800  | -2.92381900 | 1.23295000  |
| H  | 1.20468400  | -3.37658200 | 0.51742800  |
| H  | 1.10410700  | -2.38546500 | 1.98305500  |
| H  | -0.01707100 | -3.73594800 | 1.75199800  |
| C  | -1.32097700 | -2.82280600 | -0.50230500 |
| H  | -1.86189800 | -3.62714000 | 0.01597100  |
| H  | -2.06401400 | -2.21034400 | -1.02765700 |
| H  | -0.66799500 | -3.28355000 | -1.25135900 |
| C  | -1.48895600 | -1.43312700 | 1.59326600  |
| H  | -2.25736900 | -0.79405400 | 1.14061800  |
| H  | -2.00800300 | -2.25154900 | 2.11088500  |
| H  | -0.96644100 | -0.84439400 | 2.35817300  |
| Cl | 1.55353000  | -1.23003500 | -1.37838400 |
| Cl | -1.55353000 | 1.23003500  | -1.37838400 |

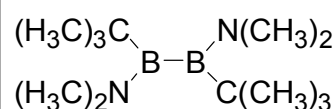

SCF energy=-634.6699027

|   |             |             |             |
|---|-------------|-------------|-------------|
| B | 0.85794700  | -0.15207900 | 0.16072800  |
| B | -0.85791400 | 0.15233800  | 0.16054400  |
| C | 1.84902600  | 0.71929300  | -0.81796700 |
| C | -1.84915100 | -0.72029800 | -0.81695000 |
| C | 1.03255500  | 1.78678000  | -1.58962500 |
| H | 0.50550500  | 2.46953300  | -0.91216300 |
| H | 1.69316700  | 2.39610900  | -2.22432100 |
| H | 0.28289600  | 1.33069600  | -2.24666000 |
| C | 2.92008200  | 1.50024300  | -0.00974700 |
| H | 3.53846000  | 2.10581700  | -0.68951000 |
| H | 2.45733500  | 2.19256900  | 0.70502300  |
| H | 3.59946700  | 0.85550400  | 0.55630700  |
| C | 2.55494900  | -0.14820100 | -1.89312700 |
| H | 3.22012700  | -0.91054500 | -1.47524500 |
| H | 1.82860300  | -0.66828500 | -2.52921300 |
| H | 3.16516500  | 0.48855600  | -2.55181100 |
| C | -2.55485900 | 0.14528700  | -1.89377300 |
| H | -3.22054700 | 0.90801100  | -1.47740200 |
| H | -1.82846400 | 0.66461800  | -2.53041500 |
| H | -3.16459900 | -0.49276100 | -2.55164700 |
| C | -2.92050400 | -1.49942000 | -0.00737900 |
| H | -3.53924500 | -2.10583200 | -0.68607700 |
| H | -2.45802700 | -2.19080100 | 0.70848200  |
| H | -3.59949200 | -0.85337300 | 0.55766400  |
| C | -1.03289500 | -1.78935700 | -1.58667000 |
| H | -0.50572800 | -2.47083300 | -0.90802400 |
| H | -1.69367300 | -2.39986400 | -2.22006300 |
| H | -0.28336000 | -1.33457200 | -2.24476100 |
| N | -1.35207100 | 1.15732100  | 1.03655200  |
| N | 1.35228500  | -1.15581200 | 1.03805600  |
| C | -2.72335400 | 1.64548200  | 1.17781000  |
| H | -2.76298900 | 2.72974400  | 0.99411700  |
| H | -3.09467900 | 1.47026100  | 2.19894100  |
| H | -3.39920200 | 1.16062000  | 0.48049600  |
| C | -0.48486900 | 1.89081300  | 1.95872700  |
| H | -0.46476800 | 2.96388000  | 1.71329900  |
| H | 0.53492800  | 1.50644600  | 1.92417700  |
| H | -0.85116700 | 1.79591400  | 2.99233100  |
| C | 0.48519100  | -1.88857100 | 1.96087600  |
| H | 0.46561100  | -2.96195100 | 1.71675200  |
| H | -0.53475100 | -1.50466200 | 1.92558500  |
| H | 0.85118300  | -1.79226000 | 2.99446000  |
| C | 2.72362700  | -1.64365600 | 1.17971800  |
| H | 2.76386400  | -2.72772500 | 0.99493000  |
| H | 3.09411200  | -1.46933600 | 2.20130000  |
| H | 3.39981800  | -1.15771100 | 0.48348000  |

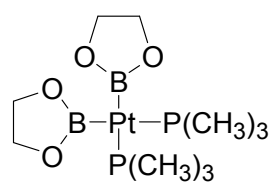

SCF energy=-1549.5413318

|    |             |             |             |
|----|-------------|-------------|-------------|
| Pt | -0.19831200 | 0.00180000  | 0.00011400  |
| P  | -1.70335100 | -1.89377800 | -0.04520800 |
| C  | -1.27287100 | -3.18000900 | -1.30699600 |
| H  | -1.96516600 | -4.03002300 | -1.26495700 |
| H  | -0.25487600 | -3.53730700 | -1.12766100 |
| H  | -1.30481100 | -2.73775000 | -2.30812700 |
| C  | -1.66132900 | -2.86245500 | 1.52976100  |
| H  | -2.23808500 | -3.79203100 | 1.44565500  |
| H  | -2.07523200 | -2.25687900 | 2.34311000  |
| H  | -0.61835700 | -3.08823000 | 1.76951400  |
| C  | -3.53386000 | -1.75150800 | -0.33524300 |
| H  | -4.01392700 | -2.73813900 | -0.32766200 |
| H  | -3.72191800 | -1.27676600 | -1.30428100 |
| H  | -3.98962900 | -1.13375800 | 0.44440200  |
| P  | -1.65904000 | 1.93137700  | 0.04479300  |
| C  | -1.19612100 | 3.20954800  | 1.30346800  |
| H  | -1.86920300 | 4.07486300  | 1.26156100  |
| H  | -0.17090900 | 3.54378400  | 1.12089400  |
| H  | -1.23530600 | 2.77001500  | 2.30552400  |
| C  | -1.59662300 | 2.89702500  | -1.53158000 |
| H  | -2.15167200 | 3.83976600  | -1.44766700 |
| H  | -2.02555500 | 2.30056400  | -2.34388000 |
| H  | -0.54909200 | 3.09867600  | -1.77306800 |
| C  | -3.49243500 | 1.83529900  | 0.33850300  |
| H  | -3.94614300 | 2.83429100  | 0.33236200  |
| H  | -3.69052800 | 1.36558100  | 1.30796400  |
| H  | -3.96677600 | 1.23018300  | -0.44004600 |
| B  | 1.40475600  | -1.31201100 | -0.05472500 |
| B  | 1.43347700  | 1.27953300  | 0.05484100  |
| O  | 2.37993200  | -1.37746000 | -1.04934600 |
| O  | 1.64430600  | -2.29136100 | 0.91519400  |
| O  | 2.40566100  | 1.32828300  | 1.05338600  |
| O  | 1.69842900  | 2.24882600  | -0.91858600 |
| C  | 3.26209200  | -2.47775900 | -0.77885200 |
| H  | 3.05879200  | -3.28201600 | -1.49889900 |
| H  | 4.29881900  | -2.14958400 | -0.90682000 |
| C  | 2.92926100  | -2.88665000 | 0.66823900  |
| H  | 2.86005400  | -3.97063200 | 0.80881500  |
| H  | 3.64865000  | -2.48163700 | 1.39115600  |
| C  | 3.31293700  | 2.40754800  | 0.78128000  |
| H  | 4.34162000  | 2.05746400  | 0.91589600  |
| H  | 3.12404400  | 3.21996000  | 1.49611300  |
| C  | 2.99573700  | 2.81578800  | -0.66942400 |
| H  | 3.70862900  | 2.39009000  | -1.38687000 |
| H  | 2.95225500  | 3.90025400  | -0.81639800 |

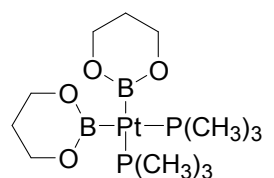

SCF energy=-1628.1728435

|    |             |             |             |
|----|-------------|-------------|-------------|
| Pt | -0.37306100 | 0.02195000  | -0.00225400 |
| P  | -1.86565800 | -1.88712100 | -0.09439000 |
| C  | -1.36365800 | -3.19642800 | -1.30648000 |
| H  | -2.05062400 | -4.05180700 | -1.28411200 |
| H  | -0.35311000 | -3.54107400 | -1.07013500 |
| H  | -1.34769900 | -2.77240700 | -2.31593700 |
| C  | -1.90882800 | -2.83313000 | 1.49563800  |
| H  | -2.45980600 | -3.77659400 | 1.39349400  |
| H  | -2.38307000 | -2.22330100 | 2.27205900  |
| H  | -0.87777900 | -3.03050200 | 1.80260900  |

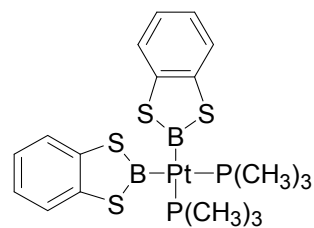

SCF energy=-3146.328587

|    |             |             |             |
|----|-------------|-------------|-------------|
| Pt | 0.00932600  | 1.11818100  | 0.03334600  |
| P  | 1.90282500  | 2.66801400  | 0.09420100  |
| C  | 2.58119700  | 3.06077200  | -1.58167800 |
| H  | 3.47530600  | 3.69228600  | -1.51428800 |
| H  | 1.82353500  | 3.57559300  | -2.18139800 |
| H  | 2.83919300  | 2.12578500  | -2.08883900 |
| C  | 1.72745200  | 4.35667700  | 0.84702300  |
| H  | 2.66928300  | 4.91534800  | 0.78548700  |
| H  | 1.44816300  | 4.25898900  | 1.90157000  |
| H  | 0.94813000  | 4.93175000  | 0.33750300  |
| C  | 3.40475000  | 2.06674600  | 0.98714800  |
| H  | 4.20129000  | 2.82010600  | 0.96369900  |
| H  | 3.76641800  | 1.14501700  | 0.52355500  |
| H  | 3.15038000  | 1.84005900  | 2.02723700  |
| P  | -1.77886400 | 2.77480400  | -0.08755400 |
| C  | -3.48361500 | 2.14535500  | -0.41964100 |
| H  | -4.19836300 | 2.97444900  | -0.48568000 |
| H  | -3.78905600 | 1.46723600  | 0.38274100  |
| H  | -3.49482100 | 1.57988400  | -1.35632000 |
| C  | -2.06842100 | 3.79694500  | 1.43087100  |
| H  | -2.90704900 | 4.48966000  | 1.29030500  |
| H  | -1.17149400 | 4.36967200  | 1.68385700  |
| H  | -2.29468800 | 3.13163800  | 2.27052700  |
| C  | -1.62400900 | 4.05724400  | -1.41876400 |
| H  | -2.48441900 | 4.73744200  | -1.42063500 |
| H  | -1.56669100 | 3.55777300  | -2.39162500 |
| H  | -0.71106700 | 4.64548700  | -1.28582100 |
| B  | -1.34611100 | -0.42954400 | -0.00613900 |
| B  | 1.31138500  | -0.47944300 | 0.04177000  |
| C  | 4.65647000  | -4.27214300 | 0.66895400  |
| C  | 3.00999400  | -2.49967600 | 0.69915700  |
| C  | 3.18629500  | -2.31646000 | -0.68597100 |
| C  | 4.09828000  | -3.11529700 | -1.38894600 |
| C  | 4.83114100  | -4.08964000 | -0.71007200 |
| H  | 5.22725000  | -5.03382700 | 1.19378300  |
| H  | 4.22899400  | -2.97481600 | -2.45880900 |
| H  | 5.53758400  | -4.70933000 | -1.25627200 |
| C  | 3.74812800  | -3.48173900 | 1.37413700  |
| H  | 3.60806900  | -3.62509400 | 2.44237700  |
| C  | -3.26576400 | -2.23533900 | 0.67303800  |
| C  | -4.18835100 | -3.03825100 | 1.35738300  |
| C  | -4.97349400 | -3.94851600 | 0.64857600  |
| C  | -4.84075600 | -4.06351100 | -0.74228500 |
| C  | -3.92240500 | -3.26872300 | -1.42947700 |
| C  | -3.13251300 | -2.35052900 | -0.72417100 |
| H  | -4.28677100 | -2.95058900 | 2.43629700  |
| H  | -5.68813200 | -4.57109700 | 1.18067800  |
| H  | -5.45207000 | -4.77562300 | -1.29055900 |
| H  | -3.81481000 | -3.35950600 | -2.50723200 |
| S  | 2.20405500  | -1.04910700 | -1.45218800 |
| S  | 1.82687700  | -1.44567600 | 1.50332300  |
| S  | -2.21977200 | -1.04605000 | 1.47936400  |
| S  | -1.93263800 | -1.29649200 | -1.50379300 |

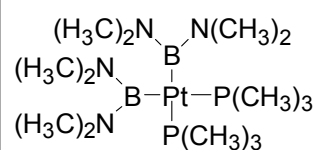

SCF energy=-1629.6527587

|    |            |             |             |
|----|------------|-------------|-------------|
| Pt | 0.32755800 | -0.00039400 | -0.00004900 |
| P  | 1.93335500 | 1.80778700  | -0.37706300 |



|   |             |             |             |
|---|-------------|-------------|-------------|
| H | 4.55507100  | 1.10441100  | -0.88662600 |
| H | 3.15806400  | 2.17147800  | -1.17334100 |
| H | 3.32306400  | 0.67204000  | -2.10086300 |
| C | 3.05286400  | 1.02362100  | 1.72763300  |
| H | 4.14684700  | 1.02211500  | 1.81160800  |
| H | 2.62953100  | 0.48555400  | 2.58193000  |
| H | 2.69705300  | 2.05745400  | 1.77132900  |
| B | -1.98419500 | -0.39873900 | 0.03270300  |
| B | 0.07298600  | -2.04344500 | -0.30104300 |
| C | -0.00236600 | -2.67624000 | -1.77941300 |
| H | -0.55148600 | -2.02620100 | -2.47141300 |
| H | -0.55825700 | -3.62989000 | -1.74130700 |
| C | 1.38092200  | -2.97128800 | -2.40481700 |
| H | 1.28105700  | -3.45744600 | -3.38424200 |
| H | 1.98405400  | -3.63740300 | -1.77363900 |
| H | 1.95195100  | -2.04671600 | -2.55912300 |
| C | 0.17660800  | -3.12827700 | 0.86623200  |
| H | 0.92710800  | -3.88732900 | 0.57879500  |
| H | -0.77767200 | -3.68607200 | 0.80812200  |
| C | 0.40652200  | -2.69575100 | 2.32272600  |
| H | 0.37474200  | -3.54754800 | 3.01656700  |
| H | -0.34865700 | -1.96972100 | 2.64282800  |
| H | 1.38205400  | -2.20985300 | 2.44980200  |
| C | -2.86980500 | -0.66794100 | -1.27494400 |
| H | -2.90533000 | -1.77082200 | -1.36001600 |
| H | -2.34397100 | -0.35110900 | -2.18593900 |
| C | -4.32014000 | -0.13963200 | -1.31311900 |
| H | -4.83079300 | -0.42943900 | -2.24123000 |
| H | -4.35561300 | 0.95730800  | -1.25967300 |
| H | -4.92052600 | -0.51766400 | -0.47811800 |
| C | -2.74569200 | -0.41797000 | 1.44534400  |
| H | -3.53107400 | 0.35984900  | 1.41896100  |
| H | -2.08235400 | -0.14987400 | 2.27774700  |
| C | -3.43348000 | -1.76396800 | 1.78340200  |
| H | -3.97808900 | -1.70713500 | 2.73521300  |
| H | -2.69890600 | -2.57229100 | 1.87738000  |
| H | -4.15122000 | -2.06383900 | 1.01087700  |

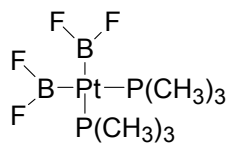

SCF energy=-1490.8525168

|    |             |             |             |
|----|-------------|-------------|-------------|
| Pt | -0.01110700 | 0.31247800  | -0.01716500 |
| P  | -1.90085000 | -1.20933600 | -0.00403300 |
| C  | -3.56990600 | -0.41473700 | -0.04550900 |
| H  | -4.36837300 | -1.16653900 | -0.03545000 |
| H  | -3.66417100 | 0.19618600  | -0.94899700 |
| H  | -3.68749400 | 0.24363600  | 0.82119600  |
| C  | -2.04205000 | -2.40832000 | -1.40859100 |
| H  | -2.95525700 | -3.01011600 | -1.32667200 |
| H  | -1.17671400 | -3.07705000 | -1.42500600 |
| H  | -2.06409000 | -1.85573800 | -2.35353800 |
| C  | -2.05540700 | -2.30116400 | 1.48396100  |
| H  | -2.96425500 | -2.91324800 | 1.43780300  |
| H  | -2.09019200 | -1.67918800 | 2.38423800  |
| H  | -1.18655200 | -2.96203400 | 1.56175800  |
| P  | 1.85364700  | -1.25073400 | -0.01213900 |
| C  | 3.14715400  | -0.88565900 | -1.28251300 |
| H  | 3.98579100  | -1.58852600 | -1.21022900 |
| H  | 3.52031900  | 0.13459200  | -1.15304300 |
| H  | 2.70573300  | -0.95256500 | -2.28220100 |
| C  | 2.80444300  | -1.19575600 | 1.57227800  |
| H  | 3.70575700  | -1.81799300 | 1.51901100  |
| H  | 2.17131300  | -1.55081500 | 2.39212300  |
| H  | 3.08541000  | -0.16135800 | 1.79082400  |
| C  | 1.64112900  | -3.07894600 | -0.25328700 |

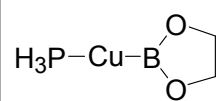

SCF energy=-793.2540722

|    |             |             |             |
|----|-------------|-------------|-------------|
| Cu | -0.94065800 | 0.00139900  | -0.00196900 |
| P  | -3.29964600 | -0.00105100 | 0.00187800  |
| H  | -4.00234800 | -0.37334300 | 1.17167500  |
| H  | -4.00504900 | -0.82900400 | -0.90247000 |
| H  | -4.00776300 | 1.19517800  | -0.26011100 |
| B  | 1.06577200  | 0.00072800  | -0.00065700 |
| O  | 1.85326200  | -1.14249400 | 0.05076700  |
| O  | 1.85538400  | 1.14247200  | -0.05077000 |
| C  | 3.24302000  | -0.77065000 | -0.05445700 |
| H  | 3.80433300  | -1.26152300 | 0.74722300  |
| H  | 3.62745700  | -1.12347400 | -1.01924100 |
| C  | 3.24425800  | 0.76821900  | 0.05716400  |
| H  | 3.62752600  | 1.12065400  | 1.02254000  |
| H  | 3.80791600  | 1.25783100  | -0.74361400 |

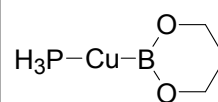

SCF energy=-832.5708713

|    |             |             |             |
|----|-------------|-------------|-------------|
| P  | 3.62045200  | -0.00074900 | 0.06126500  |
| B  | -0.76440300 | 0.00061400  | -0.08598700 |
| O  | -1.45742700 | -1.20013200 | -0.10814500 |
| O  | -1.45873000 | 1.20059500  | -0.10775900 |
| C  | -3.50413900 | -0.00094200 | 0.48892300  |
| H  | -4.59501000 | -0.00153200 | 0.35884300  |
| H  | -3.29764100 | -0.00085300 | 1.56749800  |
| C  | -2.89089800 | 1.24319500  | -0.14873000 |
| H  | -3.20759600 | 1.33283200  | -1.19809700 |
| H  | -3.20009400 | 2.15575900  | 0.37311800  |
| C  | -2.88955600 | -1.24437700 | -0.14881800 |
| H  | -3.20634400 | -1.33441600 | -1.19812100 |
| H  | -3.19759900 | -2.15728400 | 0.37311800  |
| Cu | 1.25058100  | 0.00092400  | -0.01503900 |
| H  | 4.35461000  | -0.90677200 | -0.74096100 |
| H  | 4.34251600  | 1.16534500  | -0.28853200 |
| H  | 4.29235800  | -0.26267400 | 1.27921100  |

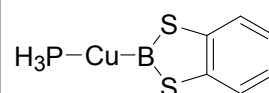

SCF energy=-1591.6519952

|    |             |             |             |
|----|-------------|-------------|-------------|
| P  | 4.76638000  | 0.00043800  | -0.00142700 |
| B  | 0.42522700  | -0.00029300 | 0.00084300  |
| C  | -2.20092600 | -0.70391200 | -0.00032300 |
| C  | -3.41512300 | -1.40522400 | -0.00041900 |
| C  | -4.61891600 | -0.70114200 | -0.00060900 |
| C  | -4.61874100 | 0.70184900  | -0.00061500 |
| C  | -3.41477200 | 1.40563000  | -0.00042400 |
| C  | -2.20074900 | 0.70401600  | -0.00032200 |
| H  | -3.41346300 | -2.49211000 | -0.00028900 |
| H  | -5.56020200 | -1.24466700 | -0.00066200 |
| H  | -5.55989100 | 1.24561000  | -0.00066700 |
| H  | -3.41284000 | 2.49251600  | -0.00030800 |
| S  | -0.60567300 | -1.49156900 | 0.00044300  |
| S  | -0.60528700 | 1.49125500  | 0.00044800  |
| H  | 5.46515000  | 1.06430300  | 0.61360400  |
| H  | 5.46585300  | 0.00178100  | -1.22977000 |
| H  | 5.46706700  | -1.06288800 | 0.61234600  |
| Cu | 2.41783500  | -0.00041100 | 0.00086000  |

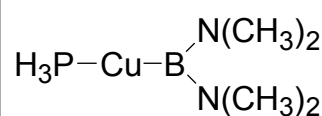

SCF energy=-833.3171975

|   |             |            |             |
|---|-------------|------------|-------------|
| P | -3.55273300 | 0.00036000 | -0.00075700 |
| B | 0.89843600  | 0.00019400 | 0.00026500  |

|   |             |             |             |
|---|-------------|-------------|-------------|
| H | 2.60359400  | -3.59958200 | -0.17835600 |
| H | 1.21420700  | -3.27756400 | -1.24168900 |
| H | 0.96513600  | -3.48714400 | 0.50488200  |
| B | -1.28255500 | 1.92853800  | 0.02485300  |
| B | 1.35259800  | 1.85656200  | -0.00234800 |
| F | 1.97966900  | 2.28716800  | 1.11789400  |
| F | 1.79596400  | 2.49098500  | -1.10931600 |
| F | -1.77060500 | 2.47158300  | 1.16327900  |
| F | -1.79704900 | 2.50968800  | -1.08138600 |

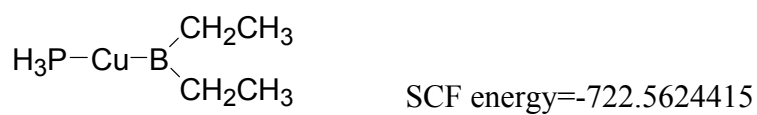

|    |             |             |             |
|----|-------------|-------------|-------------|
| P  | 3.21503900  | -0.26677200 | 0.00095900  |
| B  | -1.22730700 | -0.06892500 | -0.00018900 |
| C  | -2.00620300 | 1.31095200  | -0.00980700 |
| H  | -2.71377700 | 1.29798600  | 0.84040300  |
| H  | -2.67013500 | 1.29655700  | -0.89519700 |
| C  | -1.20333200 | 2.62108100  | 0.00852600  |
| H  | -1.85102000 | 3.50895600  | -0.00809200 |
| H  | -0.53229500 | 2.68180700  | -0.85806400 |
| H  | -0.57589500 | 2.68396400  | 0.90708400  |
| C  | -2.06468000 | -1.42500900 | 0.00639400  |
| H  | -1.71737600 | -2.01190200 | 0.87510100  |
| H  | -1.71154700 | -2.02686700 | -0.84940800 |
| C  | -3.60592600 | -1.37809500 | 0.00082100  |
| H  | -4.04470100 | -2.38516500 | 0.00496900  |
| H  | -3.99073700 | -0.85828900 | -0.88600600 |
| H  | -3.99699600 | -0.84839600 | 0.87898600  |
| H  | 3.96694900  | 0.89289600  | -0.30806100 |
| H  | 3.90478700  | -1.15057300 | -0.86462900 |
| H  | 3.91250400  | -0.60978900 | 1.18488300  |
| Cu | 0.80041500  | -0.16891600 | -0.00244900 |

**Radicals:**

$$\text{HO}-\text{B} \cdot$$

$$\text{HO}$$
 SCF energy=-176.5281004

|   |            |             |             |
|---|------------|-------------|-------------|
| B | 0.00000000 | 0.00000000  | 0.47792100  |
| O | 0.00000000 | -1.17583400 | -0.19627200 |
| H | 0.00000000 | -1.95475800 | 0.37537500  |
| O | 0.00000000 | 1.17583400  | -0.19627200 |
| H | 0.00000000 | 1.95475800  | 0.37537500  |

$$\text{HO}-\text{B} \cdot$$

$$\text{H}_3\text{C}$$
 SCF energy=-140.573956

|   |             |             |             |
|---|-------------|-------------|-------------|
| B | -0.13589600 | -0.52995300 | 0.00005300  |
| O | -1.26078800 | 0.21868500  | 0.00001300  |
| H | -2.08412600 | -0.29062700 | -0.00015600 |
| C | 1.30442600  | 0.08566000  | 0.00000800  |
| H | 1.87071300  | -0.25515100 | 0.87677000  |
| H | 1.86981100  | -0.25369600 | -0.87792000 |
| H | 1.28283300  | 1.18580100  | 0.00088700  |

$$\text{H}_3\text{C}-\text{B} \cdot$$

$$\text{H}_3\text{C}$$
 SCF energy=-104.612532

|   |             |             |             |
|---|-------------|-------------|-------------|
| B | 0.00000400  | 0.57026500  | -0.00000200 |
| C | -1.40572800 | -0.09869000 | 0.01077800  |
| H | -2.20050600 | 0.50259400  | 0.46633100  |

|    |             |             |             |
|----|-------------|-------------|-------------|
| N  | 1.62059000  | 1.25031400  | -0.01737800 |
| N  | 1.61784900  | -1.25156900 | 0.01742000  |
| C  | 0.99944400  | 2.51572000  | 0.32988600  |
| H  | 1.54178200  | 3.02182900  | 1.14564200  |
| H  | -0.02797600 | 2.34521700  | 0.66292700  |
| H  | 0.97959600  | 3.20612300  | -0.53196800 |
| C  | 2.95571100  | 1.43990200  | -0.56989900 |
| H  | 3.69603600  | 1.73940600  | 0.19177300  |
| H  | 3.30717100  | 0.52762200  | -1.05510200 |
| H  | 2.93740700  | 2.23638800  | -1.33172800 |
| C  | 0.99346600  | -2.51564300 | -0.32886900 |
| H  | 1.53313800  | -3.02280400 | -1.14574100 |
| H  | -0.03424900 | -2.34288500 | -0.65990200 |
| H  | 0.97375700  | -3.20610100 | 0.53293900  |
| C  | 2.95326700  | -1.44405900 | 0.56824600  |
| H  | 3.69192500  | -1.74531000 | -0.19434600 |
| H  | 2.93414400  | -2.24039300 | 1.33021200  |
| H  | 3.30734200  | -0.53248500 | 1.05286500  |
| H  | -4.26730200 | -0.29979900 | -1.18669400 |
| H  | -4.26919000 | -0.87530800 | 0.85196800  |
| H  | -4.26892100 | 1.17696700  | 0.33099600  |
| Cu | -1.14883600 | 0.00132500  | 0.00068000  |

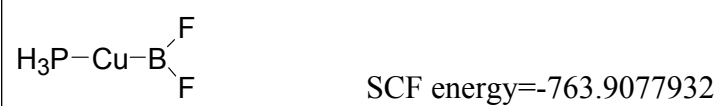

|    |             |             |             |
|----|-------------|-------------|-------------|
| P  | 2.57453000  | 0.00061600  | 0.00068200  |
| B  | -1.78767700 | 0.00037100  | 0.00022100  |
| H  | 3.27632800  | -1.18400200 | -0.31853600 |
| H  | 3.27300800  | 0.87313900  | -0.86448400 |
| H  | 3.26940300  | 0.31741800  | 1.18999600  |
| Cu | 0.21439900  | -0.00130400 | -0.00110700 |
| F  | -2.54088800 | -1.12086200 | 0.00077100  |
| F  | -2.53865500 | 1.12310500  | 0.00075900  |

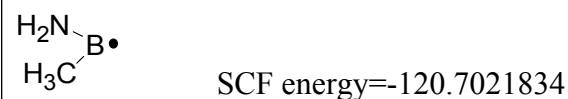

|   |             |             |             |
|---|-------------|-------------|-------------|
| B | 0.08584200  | 0.55685600  | 0.00002600  |
| N | 1.30946500  | -0.10347400 | 0.00004300  |
| H | 2.20377700  | 0.36926600  | -0.00021200 |
| H | 1.39851100  | -1.11941500 | -0.00003600 |
| C | -1.34117100 | -0.09389800 | -0.00001600 |
| H | -1.91909900 | 0.22464800  | 0.87772100  |
| H | -1.91955600 | 0.22618600  | -0.87685400 |
| H | -1.31206900 | -1.19726300 | -0.00095400 |

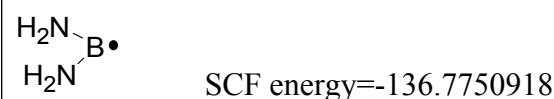

|   |             |             |             |
|---|-------------|-------------|-------------|
| B | 0.00001400  | 0.52944300  | 0.00003700  |
| N | 1.26270500  | -0.09317900 | -0.00003700 |
| H | 2.12622700  | 0.42879100  | -0.00062100 |
| H | 1.40586100  | -1.10018200 | 0.00102300  |
| N | -1.26270700 | -0.09317800 | 0.00004300  |
| H | -2.12618600 | 0.42885900  | 0.00039800  |
| H | -1.40595800 | -1.10017600 | -0.00102300 |

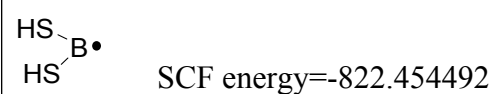

|   |            |             |             |
|---|------------|-------------|-------------|
| B | 0.00000000 | 0.00000000  | 0.64399100  |
| H | 0.00000000 | -2.36057100 | 0.95309000  |
| H | 0.00000000 | 2.36057100  | 0.95309000  |
| S | 0.00000000 | -1.59358100 | -0.16019200 |

|   |             |             |             |
|---|-------------|-------------|-------------|
| H | -1.68977400 | -0.23173400 | -1.04859700 |
| H | -1.41198800 | -1.10435200 | 0.46375800  |
| C | 1.40574000  | -0.09867200 | -0.01077900 |
| H | 2.20070200  | 0.50282800  | -0.46571400 |
| H | 1.68940700  | -0.23243400 | 1.04861100  |
| H | 1.41206500  | -1.10405900 | -0.46437200 |

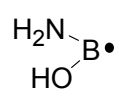

SCF energy=-156.6531282

|   |             |             |             |
|---|-------------|-------------|-------------|
| B | -0.04962800 | 0.51767200  | 0.00011700  |
| O | -1.20689700 | -0.21044400 | 0.00034300  |
| H | -2.01036000 | 0.32488200  | -0.00204900 |
| N | 1.21396300  | -0.08288900 | -0.00027400 |
| H | 1.34083400  | -1.09195600 | -0.00032700 |
| H | 2.07510100  | 0.44248700  | 0.00095900  |

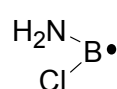

SCF energy=-541.0372644

|    |             |             |             |
|----|-------------|-------------|-------------|
| B  | -0.52464200 | 0.61357300  | -0.00014300 |
| N  | -1.68636000 | -0.14224700 | 0.00000200  |
| H  | -1.70057300 | -1.15964900 | -0.00028400 |
| H  | -2.60586800 | 0.27943700  | 0.00051600  |
| Cl | 1.10201000  | -0.07011300 | 0.00002700  |

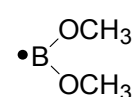

SCF energy= -255.1247803

|   |             |             |             |
|---|-------------|-------------|-------------|
| B | 0.02861200  | 0.79695800  | 0.00027300  |
| O | -1.31165800 | 0.69455600  | -0.00016400 |
| O | 0.86887200  | -0.26527100 | 0.00016400  |
| C | -1.97710100 | -0.58382800 | -0.00005500 |
| H | -3.05026100 | -0.38364000 | -0.01531300 |
| H | -1.69418900 | -1.16264200 | -0.88502300 |
| H | -1.71749300 | -1.14928200 | 0.90059800  |
| C | 2.29285300  | -0.14182400 | -0.00012000 |
| H | 2.68407700  | -0.63950200 | -0.89256100 |
| H | 2.59815200  | 0.90973000  | -0.00000300 |
| H | 2.68443300  | -0.63982300 | 0.89198400  |

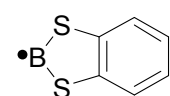

SCF energy= -1052.307241

|   |             |             |             |
|---|-------------|-------------|-------------|
| B | -0.00002000 | 2.39091100  | 0.00000000  |
| S | 0.00003200  | 1.45150800  | 1.51432500  |
| S | 0.00003200  | 1.45150800  | -1.51432500 |
| C | 0.00002800  | -2.55813800 | -0.70084500 |
| C | -0.00004100 | -1.35562400 | -1.40664400 |
| C | -0.00009700 | -0.14424300 | -0.70408000 |
| C | -0.00009700 | -0.14424300 | 0.70408000  |
| C | -0.00004100 | -1.35562400 | 1.40664400  |
| C | 0.00002800  | -2.55813800 | 0.70084500  |
| H | 0.00016600  | -3.49892700 | -1.24449200 |
| H | 0.00002600  | -1.35445000 | -2.49322700 |
| H | 0.00002600  | -1.35445000 | 2.49322700  |
| H | 0.00016600  | -3.49892700 | 1.24449200  |

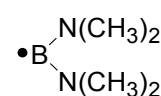

SCF energy= -293.9997491

|   |             |             |             |
|---|-------------|-------------|-------------|
| B | -0.00003100 | -0.74564400 | -0.00008300 |
| N | 1.28069200  | -0.15425800 | -0.02388900 |
| C | 2.47181800  | -0.91698100 | 0.32742500  |
| H | 3.16551100  | -0.98184800 | -0.52595800 |
| H | 3.01047400  | -0.44780900 | 1.16507800  |
| H | 2.18663300  | -1.92979900 | 0.62200800  |
| C | 1.58091300  | 1.19270400  | -0.50287200 |
| H | 1.95713700  | 1.84135400  | 0.30434800  |

|   |            |            |             |
|---|------------|------------|-------------|
| S | 0.00000000 | 1.59358100 | -0.16019200 |
|---|------------|------------|-------------|

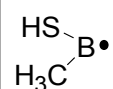

SCF energy=-463.5373344

|   |             |             |             |
|---|-------------|-------------|-------------|
| B | 0.46944500  | -0.60173800 | 0.00002200  |
| H | -1.91779600 | -0.95152900 | -0.00004700 |
| C | 1.85553300  | 0.11102100  | -0.00000100 |
| H | 2.43944500  | -0.20400900 | 0.87628200  |
| H | 2.43923500  | -0.20377400 | -0.87651000 |
| H | 1.80766200  | 1.21038700  | 0.00014700  |
| S | -1.14056100 | 0.15571800  | 0.00000100  |

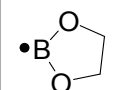

SCF energy=-253.9140393

|   |             |             |             |
|---|-------------|-------------|-------------|
| B | 0.00000000  | 0.00000000  | 1.28166300  |
| O | 0.00000000  | 1.15161000  | 0.56104700  |
| O | 0.00000000  | -1.15161000 | 0.56104700  |
| C | 0.06147900  | 0.77191800  | -0.84546000 |
| C | -0.06147900 | -0.77191800 | -0.84546000 |
| H | 0.75742700  | -1.26973600 | -1.37081600 |
| H | -1.01545500 | -1.12395700 | -1.24896200 |
| H | -0.75742700 | 1.26973600  | -1.37081600 |
| H | 1.01545500  | 1.12395700  | -1.24896200 |

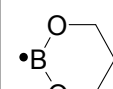

SCF energy= -293.2404155

|   |             |             |             |
|---|-------------|-------------|-------------|
| B | 0.11520700  | -1.47193900 | 0.00000000  |
| O | 0.11355600  | -0.85522100 | 1.20589800  |
| O | 0.11355600  | -0.85522100 | -1.20589800 |
| C | 0.11355600  | 0.59342600  | 1.25424400  |
| C | 0.11355600  | 0.59342600  | -1.25424400 |
| H | 1.15421400  | 0.92429100  | -1.36042600 |
| C | -0.52954900 | 1.18165500  | 0.00000000  |
| H | -0.43159200 | 0.87512300  | -2.15915500 |
| H | -0.43159200 | 0.87512300  | 2.15915500  |
| H | 1.15421400  | 0.92429100  | 1.36042600  |
| H | -0.41917100 | 2.27409000  | 0.00000000  |
| H | -1.60437600 | 0.95927700  | 0.00000000  |

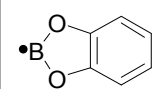

SCF energy= -406.3415352

|   |             |             |             |
|---|-------------|-------------|-------------|
| B | -0.00008600 | -2.40492200 | 0.00000000  |
| O | -0.00061200 | -1.64463200 | 1.14918200  |
| O | -0.00061200 | -1.64463200 | -1.14918200 |
| C | 0.00106700  | 2.04139600  | -0.70099400 |
| C | 0.00011700  | 0.84413000  | -1.43442100 |
| C | -0.00061200 | -0.32723000 | -0.69706000 |
| C | -0.00061200 | -0.32723000 | 0.69706000  |
| C | 0.00011700  | 0.84413000  | 1.43442100  |
| C | 0.00106700  | 2.04139600  | 0.70099400  |
| H | -0.00006200 | 0.83161400  | -2.51957000 |
| H | -0.00006200 | 0.83161400  | 2.51957000  |
| H | 0.00174300  | 2.98797400  | 1.23400400  |
| H | 0.00174300  | 2.98797400  | -1.23400400 |

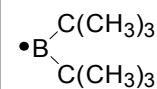

SCF energy= -340.4838129

|   |             |             |             |
|---|-------------|-------------|-------------|
| B | 0.00000000  | -0.00000100 | -0.68470000 |
| C | 1.46566300  | -0.00497600 | -0.10902600 |
| C | -1.46566300 | 0.00497700  | -0.10902600 |
| C | 2.47816400  | -0.52666600 | -1.15773600 |
| H | 3.50686100  | -0.45256000 | -0.77421500 |
| H | 2.41786100  | 0.04690200  | -2.08951600 |



|   |             |             |             |
|---|-------------|-------------|-------------|
| H | 2.35463500  | 1.15291300  | -1.28416200 |
| H | 0.69102700  | 1.65385300  | -0.93604900 |
| N | -1.28078900 | -0.15426800 | 0.02392500  |
| C | -2.47195700 | -0.91684300 | -0.32740600 |
| H | -3.16598400 | -0.98097000 | 0.52575500  |
| H | -3.01022800 | -0.44813200 | -1.16558600 |
| H | -2.18692500 | -1.92993500 | -0.62122100 |
| C | -1.58069900 | 1.19276900  | 0.50287000  |
| H | -1.95688800 | 1.84149800  | -0.30431300 |
| H | -2.35434900 | 1.15314500  | 1.28424100  |
| H | -0.69066100 | 1.65373900  | 0.93592200  |

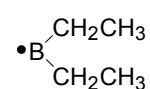

SCF energy= -183.2424985

|   |             |             |             |
|---|-------------|-------------|-------------|
| B | 0.05076500  | 0.77596700  | 0.00000000  |
| C | 1.10067700  | -0.37382000 | 0.00000000  |
| H | 0.86974100  | -1.01676900 | 0.87077100  |
| H | 0.86974100  | -1.01677000 | -0.87076900 |
| C | -1.50964400 | 0.73318000  | 0.00000000  |
| H | -1.85445600 | 1.32607100  | 0.86423500  |
| H | -1.85445600 | 1.32607100  | -0.86423500 |
| C | 2.59461600  | -0.00329100 | 0.00000000  |
| H | 2.85031400  | 0.59454500  | -0.88246500 |
| H | 2.85031400  | 0.59454600  | 0.88246400  |
| H | 3.23390300  | -0.89515700 | 0.00000000  |
| C | -2.19978100 | -0.65040200 | 0.00000000  |
| H | -1.92059100 | -1.23641200 | -0.88399100 |
| H | -1.92059100 | -1.23641200 | 0.88399100  |
| H | -3.29295500 | -0.55354900 | 0.00000000  |

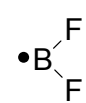

SCF energy=-224.5645921

|   |            |             |             |
|---|------------|-------------|-------------|
| B | 0.00000000 | 0.00000000  | 0.50753500  |
| F | 0.00000000 | -1.14830700 | -0.14098200 |
| F | 0.00000000 | 1.14830700  | -0.14098200 |

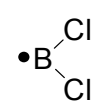

SCF energy=-945.283087

|    |            |             |             |
|----|------------|-------------|-------------|
| B  | 0.00000000 | 0.00000000  | 0.69219800  |
| Cl | 0.00000000 | -1.54501300 | -0.10179400 |
| Cl | 0.00000000 | 1.54501300  | -0.10179400 |

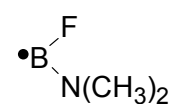

SCF energy= -259.3007283

|   |             |             |             |
|---|-------------|-------------|-------------|
| B | 0.83448700  | 0.78827100  | 0.00001000  |
| N | -0.36577600 | 0.08547500  | 0.00011300  |
| C | -0.43443200 | -1.37776200 | -0.00001400 |
| H | -0.96772700 | -1.73766200 | 0.89047300  |
| H | -0.96891500 | -1.73741100 | -0.88987500 |
| H | 0.57291300  | -1.79872500 | -0.00075400 |
| C | -1.66160000 | 0.75391700  | -0.00003000 |
| H | -2.24226000 | 0.47595900  | -0.89072400 |
| H | -2.24309400 | 0.47473200  | 0.88974500  |
| H | -1.51786100 | 1.83711300  | 0.00076800  |
| F | 2.03679300  | 0.18771000  | -0.00002300 |

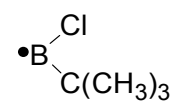

SCF energy= -642.872846

|   |             |             |             |
|---|-------------|-------------|-------------|
| B | -0.57033000 | 0.18738000  | -0.79704700 |
| C | 0.80271500  | -0.00496500 | -0.05317100 |
| C | 0.78541200  | -1.24597500 | 0.87202100  |
| H | -0.00363900 | -1.17881200 | 1.62884400  |
| H | 0.63048800  | -2.17141600 | 0.30374900  |
| H | 1.74849900  | -1.33575500 | 1.39355200  |

|   |             |             |             |
|---|-------------|-------------|-------------|
| H | 2.28994800  | -1.57871600 | -1.40551200 |
| C | 1.78326400  | 1.49352500  | 0.17557400  |
| H | 2.82967000  | 1.58687400  | 0.49930200  |
| H | 1.15244800  | 1.90862100  | 0.96986700  |
| H | 1.66091800  | 2.11664200  | -0.71950400 |
| C | 1.64433200  | -0.81833300 | 1.19721400  |
| H | 2.68276700  | -0.74161200 | 1.55177900  |
| H | 1.43338600  | -1.88346600 | 1.04010300  |
| H | 0.99459200  | -0.46147800 | 2.00328700  |
| C | -2.47816500 | 0.52664800  | -1.15774500 |
| H | -3.50686300 | 0.45253900  | -0.77422500 |
| H | -2.41785600 | -0.04693100 | -2.08951800 |
| H | -2.28995600 | 1.57869600  | -1.40553300 |
| C | -1.64433900 | 0.81834900  | 1.19720300  |
| H | -2.68277500 | 0.74162500  | 1.55176800  |
| H | -1.43340200 | 1.88348100  | 1.04007800  |
| H | -0.99459800 | 0.46151000  | 2.00328200  |
| C | -1.78325500 | -1.49352200 | 0.17559300  |
| H | -2.82966100 | -1.58687300 | 0.49932400  |
| H | -1.15243600 | -1.90860500 | 0.96989000  |
| H | -1.66090700 | -2.11664900 | -0.71947800 |

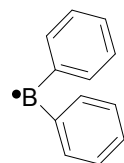

SCF energy= -488.107626

|   |             |             |             |
|---|-------------|-------------|-------------|
| B | 0.00001000  | -1.10309800 | 0.00008700  |
| C | -1.40655100 | -0.50410000 | 0.01915600  |
| C | -2.49962800 | -1.15843000 | -0.59861700 |
| C | -1.67160100 | 0.71327600  | 0.69640400  |
| C | -3.78186500 | -0.61239400 | -0.56997800 |
| H | -2.32865700 | -2.10578000 | -1.10436600 |
| C | -2.96157000 | 1.24055300  | 0.76029300  |
| H | -0.85463400 | 1.24151700  | 1.18239400  |
| C | -4.01729900 | 0.58403800  | 0.11817900  |
| H | -4.60277600 | -1.12484600 | -1.06563200 |
| H | -3.14375200 | 2.16861000  | 1.29705200  |
| H | -5.02113500 | 1.00009000  | 0.15791800  |
| C | 1.40657000  | -0.50409200 | -0.01905400 |
| C | 1.67153200  | 0.71331100  | -0.69628300 |
| C | 2.49970300  | -1.15842800 | 0.59859900  |
| C | 2.96148700  | 1.24061600  | -0.76027100 |
| H | 0.85450500  | 1.24154800  | -1.18217400 |
| C | 3.78194100  | -0.61239300 | 0.56983300  |
| H | 2.32877000  | -2.10577900 | 1.10435900  |
| C | 4.01728200  | 0.58406800  | -0.11830100 |
| H | 3.14360800  | 2.16870500  | -1.29699200 |
| H | 4.60291100  | -1.12485900 | 1.06537100  |
| H | 5.02111300  | 1.00012900  | -0.15812800 |

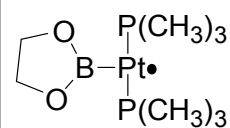

SCF energy= -1295.4907836

|    |             |             |             |
|----|-------------|-------------|-------------|
| Pt | -0.00003800 | -0.49233700 | -0.00044700 |
| P  | 2.30470100  | -0.79415100 | 0.01901800  |
| C  | 3.17291300  | -0.09062800 | -1.45393100 |
| H  | 4.25921700  | -0.22284000 | -1.37595000 |
| H  | 2.93477200  | 0.97459000  | -1.52063500 |
| H  | 2.81588000  | -0.58571200 | -2.36287800 |
| C  | 3.18281500  | 0.02808500  | 1.42375900  |
| H  | 4.26789600  | -0.11884200 | 1.35509200  |
| H  | 2.82487500  | -0.38380900 | 2.37303800  |
| H  | 2.95404800  | 1.09715700  | 1.39958400  |
| C  | 3.01544000  | -2.51135300 | 0.09164900  |
| H  | 4.11430100  | -2.49610100 | 0.09224300  |

|    |             |             |             |
|----|-------------|-------------|-------------|
| C  | 1.00263700  | 1.27659000  | 0.80677300  |
| H  | 1.97209000  | 1.21790500  | 1.32067300  |
| H  | 1.00805300  | 2.18648700  | 0.19417000  |
| H  | 0.22324100  | 1.38231300  | 1.57006800  |
| C  | 1.96544500  | -0.12367700 | -1.06412700 |
| H  | 2.01270800  | 0.74893300  | -1.72568800 |
| H  | 2.92554400  | -0.20192000 | -0.53494400 |
| H  | 1.85871900  | -1.01386200 | -1.69566800 |
| Cl | -2.16831200 | 0.00102300  | -0.10814700 |

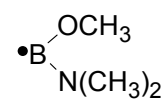

SCF energy= -274.5738129

|   |             |             |             |
|---|-------------|-------------|-------------|
| B | 0.34184100  | -0.54982200 | -0.00335100 |
| N | -0.98047000 | -0.09035200 | 0.00031400  |
| C | -1.32679800 | 1.33004300  | 0.00220700  |
| H | -1.91997300 | 1.58520800  | 0.89271300  |
| H | -1.92149500 | 1.58729700  | -0.88669200 |
| H | -0.41624600 | 1.93254500  | 0.00204700  |
| C | -2.12447500 | -0.98942100 | 0.00082500  |
| H | -2.75078500 | -0.82957800 | 0.89139500  |
| H | -1.77909600 | -2.02645500 | -0.00021700 |
| H | -2.75269700 | -0.82844300 | -0.88820500 |
| O | 1.42799500  | 0.26793300  | -0.00906500 |
| C | 2.76975000  | -0.21013600 | 0.00518500  |
| H | 3.31003400  | 0.24397700  | -0.83194400 |
| H | 2.80389800  | -1.30157300 | -0.08581000 |
| H | 3.24562700  | 0.09221100  | 0.94449300  |

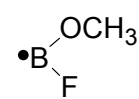

SCF energy= -239.8617844

|   |             |             |             |
|---|-------------|-------------|-------------|
| B | -0.78707300 | 0.67370100  | 0.00001300  |
| O | 0.54422900  | 0.71155100  | -0.00001000 |
| C | 1.39077200  | -0.46003800 | 0.00000400  |
| H | 2.01951800  | -0.41664100 | -0.89235500 |
| H | 0.79783300  | -1.37857400 | -0.00102100 |
| H | 2.01813000  | -0.41771200 | 0.89339200  |
| F | -1.51095400 | -0.45419500 | -0.00000200 |

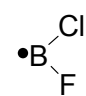

SCF energy= -584.9155109

|    |             |             |            |
|----|-------------|-------------|------------|
| B  | 0.00000000  | 0.82262400  | 0.00000000 |
| Cl | -0.68611200 | -0.78948900 | 0.00000000 |
| F  | 1.29598900  | 1.03424500  | 0.00000000 |

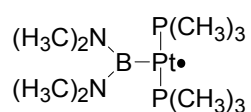

SCF energy= -1335.549395

|    |             |             |             |
|----|-------------|-------------|-------------|
| Pt | 0.01064700  | -0.58825500 | 0.00305900  |
| P  | 2.28804900  | -0.96898300 | 0.14105800  |
| C  | 3.33938000  | 0.03467600  | -1.01041800 |
| H  | 4.40786000  | -0.14554800 | -0.83770200 |
| H  | 3.11883100  | 1.09674400  | -0.86776700 |
| H  | 3.09847300  | -0.22521300 | -2.04651500 |
| C  | 3.07211600  | -0.59730500 | 1.78038000  |
| H  | 4.15175800  | -0.79134700 | 1.75448600  |
| H  | 2.61727900  | -1.22272000 | 2.55530000  |
| H  | 2.90321500  | 0.45118300  | 2.04437800  |
| C  | 2.96479500  | -2.67420500 | -0.18666400 |
| H  | 4.06107700  | -2.70010200 | -0.10963600 |
| H  | 2.66684900  | -2.99257600 | -1.19088600 |
| H  | 2.53485800  | -3.37937100 | 0.53180500  |
| P  | -2.25557200 | -1.03163200 | -0.14585400 |
| C  | -3.14763800 | -0.20899200 | -1.54811500 |
| H  | -4.22502000 | -0.41309100 | -1.51218200 |
| H  | -2.75003600 | -0.57231500 | -2.50156700 |
| H  | -2.98128000 | 0.87144900  | -1.49943000 |

|   |             |             |             |
|---|-------------|-------------|-------------|
| H | 2.66409600  | -3.08747000 | -0.77033800 |
| H | 2.66254000  | -3.01186500 | 0.99910200  |
| P | -2.30467100 | -0.79411700 | -0.01857800 |
| C | -3.18382500 | 0.02725300  | -1.42320800 |
| H | -4.26879000 | -0.12041900 | -1.35424400 |
| H | -2.82585600 | -0.38440100 | -2.37256800 |
| H | -2.95584300 | 1.09649600  | -1.39914500 |
| C | -3.01530500 | -2.51142700 | -0.08972800 |
| H | -4.11416800 | -2.49640000 | -0.08752200 |
| H | -2.66161900 | -3.08763700 | 0.77124300  |
| H | -2.66466100 | -3.01172200 | -0.99817500 |
| C | -3.17197800 | -0.08965200 | 1.45442800  |
| H | -4.25833800 | -0.22162800 | 1.37690600  |
| H | -2.93344900 | 0.97551800  | 1.52033600  |
| H | -2.81475400 | -0.58428200 | 2.36354500  |
| B | -0.00002000 | 1.59300200  | -0.00038400 |
| O | 1.13781500  | 2.40042000  | -0.11385100 |
| O | -1.13777700 | 2.40048800  | 0.11369500  |
| C | 0.74210300  | 3.78298600  | -0.20490300 |
| H | 1.37387300  | 4.38243600  | 0.45841800  |
| H | 0.89047600  | 4.12461700  | -1.23721800 |
| C | -0.74189300 | 3.78297200  | 0.20534100  |
| H | -0.89017700 | 4.12415300  | 1.23782600  |
| H | -1.37361900 | 4.38280300  | -0.45767800 |

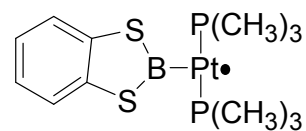

SCF energy= -2093.8850835

|    |             |             |             |
|----|-------------|-------------|-------------|
| Pt | -1.30877000 | -0.00018200 | -0.00001700 |
| P  | -1.69015000 | -2.29945100 | 0.00021500  |
| C  | -0.96265600 | -3.19375700 | -1.44465000 |
| H  | -1.11404100 | -4.27654400 | -1.35796300 |
| H  | 0.10834700  | -2.97855900 | -1.50535900 |
| H  | -1.43157900 | -2.83938800 | -2.36835800 |
| C  | -0.96084800 | -3.19416600 | 1.44387300  |
| H  | -1.11184800 | -4.27696600 | 1.35661500  |
| H  | -1.42899900 | -2.84064000 | 2.36828800  |
| H  | 0.11011200  | -2.97853100 | 1.50369200  |
| C  | -3.43422700 | -2.94178200 | 0.00119200  |
| H  | -3.46040900 | -4.04000500 | 0.00186200  |
| H  | -3.95875000 | -2.56991200 | -0.88476800 |
| H  | -3.95828800 | -2.56882000 | 0.88695500  |
| P  | -1.69158200 | 2.29885100  | -0.00009900 |
| C  | -0.96334200 | 3.19399800  | -1.44405700 |
| H  | -1.11534900 | 4.27667800  | -1.35711200 |
| H  | -1.43132200 | 2.83974300  | -2.36829000 |
| H  | 0.10780700  | 2.97934100  | -1.50402000 |
| C  | -3.43612200 | 2.93989400  | -0.00074900 |
| H  | -3.46311000 | 4.03809900  | -0.00036100 |
| H  | -3.96062900 | 2.56675300  | 0.88467700  |
| H  | -3.95966100 | 2.56742600  | -0.88703800 |
| C  | -0.96438900 | 3.19384600  | 1.44444500  |
| H  | -1.11651300 | 4.27651400  | 1.35751900  |
| H  | 0.10677700  | 2.97941400  | 1.50500100  |
| H  | -1.43284100 | 2.83941800  | 2.36836300  |
| B  | 0.74797500  | 0.00041100  | -0.00004000 |
| C  | 3.39078600  | 0.00033700  | -0.70398400 |
| C  | 4.60473000  | 0.00008100  | -1.40405100 |
| C  | 5.81052100  | 0.00028800  | -0.70081900 |
| C  | 5.81049500  | 0.00071000  | 0.70090000  |
| C  | 4.60467400  | 0.00094600  | 1.40408500  |
| C  | 3.39076100  | 0.00077300  | 0.70396100  |
| H  | 4.60290500  | -0.00024700 | -2.49106800 |
| H  | 6.75111700  | 0.00009300  | -1.24566400 |
| H  | 6.75107000  | 0.00082300  | 1.24578100  |
| H  | 4.60280400  | 0.00124000  | 2.49110100  |



|   |             |             |            |
|---|-------------|-------------|------------|
| H | -0.95060100 | -3.02983900 | 1.48692800 |
| H | 0.11596700  | -1.86327000 | 2.24475200 |
| C | 1.13337900  | -3.61743900 | 1.47506600 |
| H | 1.09927300  | -4.14721200 | 2.43635900 |
| H | 2.13495700  | -3.17582900 | 1.38444700 |
| H | 1.03764300  | -4.36782300 | 0.68102700 |
